# Supplementary material for: War-induced collapse and asymmetric recovery of large-mammal populations in Gorongosa National Park, Mozambique
Source: PLoS One. 2019 Mar 13;14(3):e0212864. doi: 10.1371/journal.pone.0212864 (PMC6415879; doi:10.1371/journal.pone.0212864)
Supplement: S1 File — (XLSX) [file pone.0212864.s010.xlsx]

## Sheet: Gorongosa_all_herbivores_2018
Id	Count	Month	Observation platform	Latitude	Longitude	Within count strip	Within Rift in 2014 count block	Species	Number
1	1969	October	Fixed-wing	-18.2545	34.645	1	0	Buffalo	5
2	1969	October	Fixed-wing	-18.2752	34.5853	1	0	Buffalo	11
3	1969	October	Fixed-wing	-18.283	34.6344	1	0	Buffalo	5
4	1969	October	Fixed-wing	-18.3007	34.5349	1	0	Buffalo	20
5	1969	October	Fixed-wing	-18.2915	34.5626	1	0	Buffalo	40
6	1969	October	Fixed-wing	-18.2993	34.5747	1	0	Buffalo	35
7	1969	October	Fixed-wing	-18.3057	34.5875	1	0	Buffalo	40
8	1969	October	Fixed-wing	-18.3014	34.6038	1	0	Buffalo	500
9	1969	October	Fixed-wing	-18.3157	34.5555	1	0	Buffalo	10
10	1969	October	Fixed-wing	-18.3306	34.5598	1	0	Buffalo	16
11	1969	October	Fixed-wing	-18.3334	34.5427	1	0	Buffalo	40
12	1969	October	Fixed-wing	-18.3334	34.7196	1	0	Buffalo	8
13	1969	October	Fixed-wing	-18.3441	34.7601	1	0	Buffalo	20
14	1969	October	Fixed-wing	-18.3185	34.7999	1	0	Buffalo	9
15	1969	October	Fixed-wing	-18.3689	34.466	1	0	Buffalo	45
16	1969	October	Fixed-wing	-18.3959	34.5669	1	0	Buffalo	800
17	1969	October	Fixed-wing	-18.3661	34.6592	1	0	Buffalo	200
18	1969	October	Fixed-wing	-18.3782	34.6656	1	0	Buffalo	200
19	1969	October	Fixed-wing	-18.408	34.6529	1	0	Buffalo	50
20	1969	October	Fixed-wing	-18.4585	34.4639	1	0	Buffalo	120
21	1969	October	Fixed-wing	-18.4443	34.4965	1	0	Buffalo	7
22	1969	October	Fixed-wing	-18.4478	34.5235	1	0	Buffalo	80
23	1969	October	Fixed-wing	-18.44	34.5342	1	0	Buffalo	120
24	1969	October	Fixed-wing	-18.4471	34.5427	1	0	Buffalo	80
25	1969	October	Fixed-wing	-18.4791	34.5008	1	0	Buffalo	17
26	1969	October	Fixed-wing	-18.4364	34.6408	1	0	Buffalo	8
27	1969	October	Fixed-wing	-18.4521	34.6095	1	0	Buffalo	7
28	1969	October	Fixed-wing	-18.4698	34.6067	1	0	Buffalo	5
29	1969	October	Fixed-wing	-18.5004	34.564	1	0	Buffalo	100
30	1969	October	Fixed-wing	-18.4478	34.6628	1	0	Buffalo	500
31	1969	October	Fixed-wing	-18.4585	34.6592	1	0	Buffalo	60
32	1969	October	Fixed-wing	-18.472	34.6322	1	0	Buffalo	4
33	1969	October	Fixed-wing	-18.5061	34.3686	1	0	Buffalo	5
34	1969	October	Fixed-wing	-18.521	34.4432	1	0	Buffalo	60
35	1969	October	Fixed-wing	-18.5338	34.4724	1	0	Buffalo	82
36	1969	October	Fixed-wing	-18.5252	34.5647	1	0	Buffalo	300
37	1969	October	Fixed-wing	-18.5153	34.5903	1	0	Buffalo	20
38	1969	October	Fixed-wing	-18.5338	34.6131	1	0	Buffalo	200
39	1969	October	Fixed-wing	-18.5352	34.6223	1	0	Buffalo	10
40	1969	October	Fixed-wing	-18.5508	34.6237	1	0	Buffalo	40
41	1969	October	Fixed-wing	-18.5736	34.5519	1	0	Buffalo	12
42	1969	October	Fixed-wing	-18.5828	34.5974	1	0	Buffalo	4
43	1969	October	Fixed-wing	-18.5892	34.6145	1	0	Buffalo	5
44	1969	October	Fixed-wing	-18.5778	34.4745	1	0	Buffalo	20
45	1969	October	Fixed-wing	-18.5842	34.5235	1	0	Buffalo	50
46	1969	October	Fixed-wing	-18.5899	34.5335	1	0	Buffalo	8
47	1969	October	Fixed-wing	-18.5935	34.5186	1	0	Buffalo	20
48	1969	October	Fixed-wing	-18.5984	34.5292	1	0	Buffalo	22
49	1969	October	Fixed-wing	-18.6261	34.5818	1	0	Buffalo	350
50	1969	October	Fixed-wing	-18.6588	34.5647	1	0	Buffalo	10
51	1969	October	Fixed-wing	-18.6709	34.5761	1	0	Buffalo	40
52	1969	October	Fixed-wing	-18.6055	34.3502	1	0	Buffalo	52
53	1969	October	Fixed-wing	-18.6233	34.3353	1	0	Buffalo	20
54	1969	October	Fixed-wing	-18.6695	34.3296	1	0	Buffalo	120
55	1969	October	Fixed-wing	-19.0233	34.201	1	0	Buffalo	400
56	1969	October	Fixed-wing	-18.7846	34.2834	1	1	Buffalo	50
57	1969	October	Fixed-wing	-18.7746	34.2884	1	1	Buffalo	300
58	1969	October	Fixed-wing	-18.7846	34.2926	1	1	Buffalo	120
59	1969	October	Fixed-wing	-18.7185	34.3189	1	1	Buffalo	30
60	1969	October	Fixed-wing	-18.7341	34.3118	1	1	Buffalo	300
61	1969	October	Fixed-wing	-18.7533	34.3097	1	1	Buffalo	40
62	1969	October	Fixed-wing	-18.6906	34.3353	1	1	Buffalo	10
63	1969	October	Fixed-wing	-18.6883	34.3438	1	1	Buffalo	80
64	1969	October	Fixed-wing	-18.7071	34.3477	1	1	Buffalo	8
65	1969	October	Fixed-wing	-18.7213	34.3421	1	1	Buffalo	80
66	1969	October	Fixed-wing	-18.7452	34.3608	1	1	Buffalo	50
67	1969	October	Fixed-wing	-18.7542	34.333	1	1	Buffalo	325
68	1969	October	Fixed-wing	-18.7673	34.3324	1	1	Buffalo	8
69	1969	October	Fixed-wing	-18.7696	34.3728	1	1	Buffalo	5
70	1969	October	Fixed-wing	-18.7832	34.416	1	1	Buffalo	4
71	1969	October	Fixed-wing	-18.669	34.3563	1	1	Buffalo	3
72	1969	October	Fixed-wing	-18.6616	34.3693	1	1	Buffalo	100
73	1969	October	Fixed-wing	-18.6718	34.3676	1	1	Buffalo	10
74	1969	October	Fixed-wing	-18.6207	34.4012	1	1	Buffalo	10
75	1969	October	Fixed-wing	-18.6298	34.4745	1	1	Buffalo	400
76	1969	October	Fixed-wing	-18.6468	34.5132	1	1	Buffalo	120
77	1969	October	Fixed-wing	-18.6792	34.4847	1	1	Buffalo	2
78	1969	October	Fixed-wing	-18.6707	34.5569	1	1	Buffalo	50
79	1969	October	Fixed-wing	-18.6855	34.5728	1	1	Buffalo	250
80	1969	October	Fixed-wing	-18.7855	34.5643	1	1	Buffalo	40
81	1969	October	Fixed-wing	-18.8429	34.5211	1	1	Buffalo	9
82	1969	October	Fixed-wing	-18.8401	34.5507	1	1	Buffalo	4
83	1969	October	Fixed-wing	-18.8708	34.5194	1	1	Buffalo	5
84	1969	October	Fixed-wing	-18.8844	34.4342	1	1	Buffalo	9
85	1969	October	Fixed-wing	-18.8861	34.4489	1	1	Buffalo	8
86	1969	October	Fixed-wing	-18.8958	34.4495	1	1	Buffalo	10
87	1969	October	Fixed-wing	-18.8998	34.4597	1	1	Buffalo	3
88	1969	October	Fixed-wing	-18.9361	34.283	1	1	Buffalo	3
89	1969	October	Fixed-wing	-18.9827	34.2528	1	1	Buffalo	4
90	1969	October	Fixed-wing	-19.0186	34.271	1	1	Buffalo	200
91	1969	October	Fixed-wing	-19.0373	34.225	1	1	Buffalo	300
92	1969	October	Fixed-wing	-19.0396	34.2392	1	1	Buffalo	10
93	1969	October	Fixed-wing	-19.0458	34.2261	1	1	Buffalo	200
94	1969	October	Fixed-wing	-19.0493	34.2318	1	1	Buffalo	12
95	1969	October	Fixed-wing	-18.9816	34.3301	1	1	Buffalo	3
96	1969	October	Fixed-wing	-18.9759	34.3642	1	1	Buffalo	12
97	1969	October	Fixed-wing	-18.9845	34.3665	1	1	Buffalo	12
98	1969	October	Fixed-wing	-18.9759	34.3966	1	1	Buffalo	2
99	1969	October	Fixed-wing	-18.9901	34.429	1	1	Buffalo	4
100	1969	October	Fixed-wing	-19.0009	34.3892	1	1	Buffalo	15
101	1969	October	Fixed-wing	-19.0208	34.416	1	1	Buffalo	2
102	1969	October	Fixed-wing	-19.022	34.4285	1	1	Buffalo	4
103	1969	October	Fixed-wing	-19.0669	34.4325	1	1	Buffalo	20
104	1969	October	Fixed-wing	-19.0635	34.4421	1	1	Buffalo	15
105	1969	October	Fixed-wing	-19.0566	34.4506	1	1	Buffalo	150
106	1969	October	Fixed-wing	-19.0339	34.4563	1	1	Buffalo	3
107	1969	October	Fixed-wing	-18.9737	34.4654	1	1	Buffalo	2
108	1969	October	Fixed-wing	-18.9935	34.4757	1	1	Buffalo	4
109	1969	October	Fixed-wing	-19.0026	34.4859	1	1	Buffalo	2
110	1969	October	Fixed-wing	-19.0203	34.4734	1	1	Buffalo	7
111	1969	October	Fixed-wing	-19.0305	34.4887	1	1	Buffalo	157
112	1969	October	Fixed-wing	-19.0657	34.4779	1	1	Buffalo	300
113	1969	October	Fixed-wing	-18.935	34.4643	1	1	Buffalo	6
114	1969	October	Fixed-wing	-18.943	34.4995	1	1	Buffalo	1
115	1969	October	Fixed-wing	-18.9452	34.5194	1	1	Buffalo	1
116	1969	October	Fixed-wing	-18.9316	34.562	1	1	Buffalo	9
117	1969	October	Fixed-wing	-18.9407	34.5654	1	1	Buffalo	4
118	1969	October	Fixed-wing	-19.0032	34.5143	1	1	Buffalo	15
119	1969	October	Fixed-wing	-18.9924	34.5547	1	1	Buffalo	110
120	1969	October	Fixed-wing	-18.9077	34.4984	1	1	Buffalo	4
121	1969	October	Fixed-wing	-18.9086	34.5107	1	1	Buffalo	2
122	1969	October	Fixed-wing	-18.9172	34.5157	1	1	Buffalo	6
123	1969	October	Fixed-wing	-18.9145	34.5243	1	1	Buffalo	4
124	1969	October	Fixed-wing	-18.9263	34.5125	1	1	Buffalo	6
125	1969	October	Fixed-wing	-18.93	34.5198	1	1	Buffalo	31
126	1969	October	Fixed-wing	-18.9227	34.5293	1	1	Buffalo	2
127	1969	October	Fixed-wing	-18.9118	34.5334	1	1	Buffalo	6
128	1969	October	Fixed-wing	-18.919	34.5398	1	1	Buffalo	4
129	1969	October	Fixed-wing	-19.0991	34.5243	1	1	Buffalo	1
130	1969	October	Fixed-wing	-19.1155	34.5293	1	1	Buffalo	1500
131	1969	October	Fixed-wing	-19.1141	34.5434	1	1	Buffalo	500
132	1969	October	Fixed-wing	-18.7449	34.7394	1	0	Buffalo	50
133	1969	October	Fixed-wing	-18.653	34.7712	1	0	Buffalo	8
134	1970	January	Fixed-wing	-18.2607	34.6406	1	0	Buffalo	30
135	1970	January	Fixed-wing	-18.2807	34.7005	1	0	Buffalo	25
136	1970	January	Fixed-wing	-18.2979	34.7033	1	0	Buffalo	7
137	1970	January	Fixed-wing	-18.3021	34.7256	1	0	Buffalo	2
138	1970	January	Fixed-wing	-18.3118	34.7232	1	0	Buffalo	6
139	1970	January	Fixed-wing	-18.3104	34.7729	1	0	Buffalo	35
140	1970	January	Fixed-wing	-18.3355	34.7395	1	0	Buffalo	60
141	1970	January	Fixed-wing	-18.3192	34.6262	1	0	Buffalo	10
142	1970	January	Fixed-wing	-18.3657	34.5496	1	0	Buffalo	200
143	1970	January	Fixed-wing	-18.3708	34.5691	1	0	Buffalo	8
144	1970	January	Fixed-wing	-18.3777	34.6318	1	0	Buffalo	20
145	1970	January	Fixed-wing	-18.4506	34.6322	1	0	Buffalo	18
146	1970	January	Fixed-wing	-18.446	34.6703	1	0	Buffalo	6
147	1970	January	Fixed-wing	-18.4534	34.6717	1	0	Buffalo	40
148	1970	January	Fixed-wing	-18.4859	34.6457	1	0	Buffalo	340
149	1970	January	Fixed-wing	-18.4585	34.5482	1	0	Buffalo	5
150	1970	January	Fixed-wing	-18.4956	34.538	1	0	Buffalo	30
151	1970	January	Fixed-wing	-18.4993	34.5139	1	0	Buffalo	4
152	1970	January	Fixed-wing	-18.5295	34.5153	1	0	Buffalo	8
153	1970	January	Fixed-wing	-18.5569	34.6517	1	0	Buffalo	10
154	1970	January	Fixed-wing	-18.5746	34.6109	1	0	Buffalo	8
155	1970	January	Fixed-wing	-18.5759	34.5798	1	0	Buffalo	80
156	1970	January	Fixed-wing	-18.563	34.5612	1	0	Buffalo	100
157	1970	January	Fixed-wing	-18.5151	34.4698	1	0	Buffalo	3
158	1970	January	Fixed-wing	-18.523	34.4804	1	0	Buffalo	8
159	1970	January	Fixed-wing	-18.5337	34.4619	1	0	Buffalo	10
160	1970	January	Fixed-wing	-18.5643	34.4322	1	0	Buffalo	20
161	1970	January	Fixed-wing	-18.5811	34.5362	1	0	Buffalo	3
162	1970	January	Fixed-wing	-18.6071	34.532	1	0	Buffalo	5
163	1970	January	Fixed-wing	-18.5741	34.3723	1	0	Buffalo	50
164	1970	January	Fixed-wing	-18.6785	34.3328	1	0	Buffalo	67
165	1970	January	Fixed-wing	-18.6869	34.3036	1	0	Buffalo	8
166	1970	January	Fixed-wing	-19.0267	34.2121	1	0	Buffalo	8
167	1970	January	Fixed-wing	-18.595	34.4001	1	1	Buffalo	3
168	1970	January	Fixed-wing	-18.6224	34.3997	1	1	Buffalo	5
169	1970	January	Fixed-wing	-18.6298	34.4131	1	1	Buffalo	35
170	1970	January	Fixed-wing	-18.6377	34.389	1	1	Buffalo	5
171	1970	January	Fixed-wing	-18.6577	34.4127	1	1	Buffalo	6
172	1970	January	Fixed-wing	-18.673	34.396	1	1	Buffalo	9
173	1970	January	Fixed-wing	-18.6846	34.3895	1	1	Buffalo	4
174	1970	January	Fixed-wing	-18.6948	34.4127	1	1	Buffalo	4
175	1970	January	Fixed-wing	-18.7129	34.4549	1	1	Buffalo	8
176	1970	January	Fixed-wing	-18.7175	34.389	1	1	Buffalo	8
177	1970	January	Fixed-wing	-18.7254	34.3899	1	1	Buffalo	5
178	1970	January	Fixed-wing	-18.744	34.3871	1	1	Buffalo	40
179	1970	January	Fixed-wing	-18.7431	34.3997	1	1	Buffalo	300
180	1970	January	Fixed-wing	-18.7361	34.5635	1	1	Buffalo	2000
181	1970	January	Fixed-wing	-18.7421	34.5018	1	1	Buffalo	17
182	1970	January	Fixed-wing	-18.7612	34.5459	1	1	Buffalo	40
183	1970	January	Fixed-wing	-18.7788	34.5324	1	1	Buffalo	120
184	1970	January	Fixed-wing	-18.7709	34.4837	1	1	Buffalo	10
185	1970	January	Fixed-wing	-18.7728	34.4953	1	1	Buffalo	50
186	1970	January	Fixed-wing	-18.8127	34.5269	1	1	Buffalo	12
187	1970	January	Fixed-wing	-18.8359	34.5561	1	1	Buffalo	40
188	1970	January	Fixed-wing	-18.7793	34.428	1	1	Buffalo	20
189	1970	January	Fixed-wing	-18.7951	34.4229	1	1	Buffalo	3
190	1970	January	Fixed-wing	-18.7853	34.4512	1	1	Buffalo	1000
191	1970	January	Fixed-wing	-18.8095	34.5065	1	1	Buffalo	12
192	1970	January	Fixed-wing	-18.8108	34.3858	1	1	Buffalo	2
193	1970	January	Fixed-wing	-18.8164	34.3946	1	1	Buffalo	16
194	1970	January	Fixed-wing	-18.8266	34.3751	1	1	Buffalo	9
195	1970	January	Fixed-wing	-18.8252	34.311	1	1	Buffalo	8
196	1970	January	Fixed-wing	-18.8387	34.3115	1	1	Buffalo	38
197	1970	January	Fixed-wing	-18.8768	34.2692	1	1	Buffalo	2
198	1970	January	Fixed-wing	-18.8819	34.3115	1	1	Buffalo	3
199	1970	January	Fixed-wing	-18.8935	34.2609	1	1	Buffalo	40
200	1970	January	Fixed-wing	-18.9032	34.2618	1	1	Buffalo	1
201	1970	January	Fixed-wing	-18.8967	34.2771	1	1	Buffalo	2
202	1970	January	Fixed-wing	-18.9223	34.2883	1	1	Buffalo	3
203	1970	January	Fixed-wing	-18.9292	34.2725	1	1	Buffalo	2
204	1970	January	Fixed-wing	-18.8707	34.3672	1	1	Buffalo	1500
205	1970	January	Fixed-wing	-18.8791	34.3913	1	1	Buffalo	12
206	1970	January	Fixed-wing	-18.8768	34.4043	1	1	Buffalo	3
207	1970	January	Fixed-wing	-18.9264	34.3644	1	1	Buffalo	400
208	1970	January	Fixed-wing	-18.9278	34.3974	1	1	Buffalo	1000
209	1970	January	Fixed-wing	-18.9524	34.3816	1	1	Buffalo	7
210	1970	January	Fixed-wing	-18.9603	34.3245	1	1	Buffalo	7
211	1970	January	Fixed-wing	-18.9729	34.3231	1	1	Buffalo	500
212	1970	January	Fixed-wing	-18.9715	34.3653	1	1	Buffalo	15
213	1970	January	Fixed-wing	-18.9585	34.3751	1	1	Buffalo	20
214	1970	January	Fixed-wing	-18.9961	34.2869	1	1	Buffalo	400
215	1970	January	Fixed-wing	-19.0151	34.2743	1	1	Buffalo	13
216	1970	January	Fixed-wing	-19.029	34.2623	1	1	Buffalo	300
217	1970	January	Fixed-wing	-19.0416	34.2497	1	1	Buffalo	1
218	1970	January	Fixed-wing	-18.9185	34.4391	1	1	Buffalo	10
219	1970	January	Fixed-wing	-18.9223	34.4531	1	1	Buffalo	15
220	1970	January	Fixed-wing	-18.9404	34.4563	1	1	Buffalo	12
221	1970	January	Fixed-wing	-18.9339	34.4702	1	1	Buffalo	10
222	1970	January	Fixed-wing	-18.9608	34.4243	1	1	Buffalo	10
223	1970	January	Fixed-wing	-18.9743	34.4145	1	1	Buffalo	40
224	1970	January	Fixed-wing	-19.0091	34.402	1	1	Buffalo	4
225	1970	January	Fixed-wing	-18.939	34.4986	1	1	Buffalo	13
226	1970	January	Fixed-wing	-18.9469	34.5088	1	1	Buffalo	17
227	1970	January	Fixed-wing	-18.9557	34.5018	1	1	Buffalo	3
228	1970	January	Fixed-wing	-18.9515	34.5329	1	1	Buffalo	17
229	1970	January	Fixed-wing	-18.9965	34.4285	1	1	Buffalo	200
230	1970	January	Fixed-wing	-19.0049	34.4484	1	1	Buffalo	120
231	1970	January	Fixed-wing	-19.0068	34.4772	1	1	Buffalo	60
232	1970	January	Fixed-wing	-19.0221	34.4795	1	1	Buffalo	1000
233	1970	January	Fixed-wing	-19.0351	34.4767	1	1	Buffalo	60
234	1970	January	Fixed-wing	-19.0402	34.538	1	1	Buffalo	200
235	1970	January	Fixed-wing	-18.9928	34.5078	1	1	Buffalo	4
236	1970	January	Fixed-wing	-18.9951	34.551	1	1	Buffalo	50
237	1970	January	Fixed-wing	-18.9548	34.5747	1	1	Buffalo	40
238	1970	January	Fixed-wing	-18.9088	34.5724	1	1	Buffalo	600
239	1970	January	Fixed-wing	-18.2705	34.763	1	0	Elephant	40
240	1970	January	Fixed-wing	-18.2814	34.7558	1	0	Elephant	4
241	1970	January	Fixed-wing	-18.2923	34.7531	1	0	Elephant	2
242	1970	January	Fixed-wing	-18.2805	34.7005	1	0	Elephant	20
243	1970	January	Fixed-wing	-18.2941	34.7268	1	0	Elephant	1
244	1970	January	Fixed-wing	-18.3276	34.6415	1	0	Elephant	2
245	1970	January	Fixed-wing	-18.363	34.6225	1	0	Elephant	20
246	1970	January	Fixed-wing	-18.3739	34.5708	1	0	Elephant	4
247	1970	January	Fixed-wing	-18.3793	34.7041	1	0	Elephant	12
248	1970	January	Fixed-wing	-18.4174	34.6696	1	0	Elephant	15
249	1970	January	Fixed-wing	-18.4237	34.6823	1	0	Elephant	38
250	1970	January	Fixed-wing	-18.4092	34.5998	1	0	Elephant	13
251	1970	January	Fixed-wing	-18.45	34.6143	1	0	Elephant	2
252	1970	January	Fixed-wing	-18.5063	34.6016	1	0	Elephant	45
253	1970	January	Fixed-wing	-18.4337	34.5128	1	0	Elephant	6
254	1970	January	Fixed-wing	-18.4899	34.5563	1	0	Elephant	10
255	1970	January	Fixed-wing	-18.492	34.3821	1	0	Elephant	9
256	1970	January	Fixed-wing	-18.5254	34.4409	1	0	Elephant	11
257	1970	January	Fixed-wing	-18.5196	34.459	1	0	Elephant	6
258	1970	January	Fixed-wing	-18.5326	34.4837	1	0	Elephant	1
259	1970	January	Fixed-wing	-18.537	34.5294	1	0	Elephant	20
260	1970	January	Fixed-wing	-18.5457	34.5374	1	0	Elephant	8
261	1970	January	Fixed-wing	-18.5508	34.5511	1	0	Elephant	45
262	1970	January	Fixed-wing	-18.5631	34.5519	1	0	Elephant	7
263	1970	January	Fixed-wing	-18.5312	34.6251	1	0	Elephant	14
264	1970	January	Fixed-wing	-18.5529	34.6113	1	0	Elephant	3
265	1970	January	Fixed-wing	-18.5675	34.6005	1	0	Elephant	6
266	1970	January	Fixed-wing	-18.5834	34.5859	1	0	Elephant	8
267	1970	January	Fixed-wing	-18.5979	34.6012	1	0	Elephant	6
268	1970	January	Fixed-wing	-18.6175	34.5859	1	0	Elephant	15
269	1970	January	Fixed-wing	-18.55	34.4996	1	0	Elephant	14
270	1970	January	Fixed-wing	-18.5696	34.4989	1	0	Elephant	10
271	1970	January	Fixed-wing	-18.5899	34.4844	1	0	Elephant	39
272	1970	January	Fixed-wing	-18.5972	34.4888	1	0	Elephant	1
273	1970	January	Fixed-wing	-18.5733	34.4133	1	0	Elephant	1
274	1970	January	Fixed-wing	-18.5754	34.4532	1	0	Elephant	1
275	1970	January	Fixed-wing	-18.6059	34.4713	1	0	Elephant	14
276	1970	January	Fixed-wing	-18.6117	34.483	1	0	Elephant	80
277	1970	January	Fixed-wing	-18.6073	34.5069	1	0	Elephant	9
278	1970	January	Fixed-wing	-18.6153	34.4996	1	0	Elephant	15
279	1970	January	Fixed-wing	-18.6233	34.512	1	0	Elephant	12
280	1970	January	Fixed-wing	-18.6168	34.5279	1	0	Elephant	42
281	1970	January	Fixed-wing	-18.6262	34.5424	1	0	Elephant	12
282	1970	January	Fixed-wing	-18.6313	34.5533	1	0	Elephant	66
283	1970	January	Fixed-wing	-18.6371	34.5439	1	0	Elephant	20
284	1970	January	Fixed-wing	-18.6414	34.5685	1	0	Elephant	9
285	1970	January	Fixed-wing	-18.6349	34.5874	1	0	Elephant	2
286	1970	January	Fixed-wing	-18.6414	34.6179	1	0	Elephant	6
287	1970	January	Fixed-wing	-18.624	34.4648	1	1	Elephant	100
288	1970	January	Fixed-wing	-18.6298	34.48	1	1	Elephant	20
289	1970	January	Fixed-wing	-18.6501	34.5105	1	1	Elephant	23
290	1970	January	Fixed-wing	-18.6472	34.5236	1	1	Elephant	60
291	1970	January	Fixed-wing	-18.6139	34.3923	1	1	Elephant	10
292	1970	January	Fixed-wing	-18.6262	34.414	1	1	Elephant	4
293	1970	January	Fixed-wing	-18.632	34.3734	1	1	Elephant	29
294	1970	January	Fixed-wing	-18.6494	34.372	1	1	Elephant	22
295	1970	January	Fixed-wing	-18.6494	34.4017	1	1	Elephant	16
296	1970	January	Fixed-wing	-18.685	34.4365	1	1	Elephant	4
297	1970	January	Fixed-wing	-18.6791	34.4503	1	1	Elephant	6
298	1970	January	Fixed-wing	-18.6726	34.4648	1	1	Elephant	45
299	1970	January	Fixed-wing	-18.6835	34.488	1	1	Elephant	43
300	1970	January	Fixed-wing	-18.6929	34.4844	1	1	Elephant	1
301	1970	January	Fixed-wing	-18.6871	34.5308	1	1	Elephant	32
302	1970	January	Fixed-wing	-18.6958	34.5548	1	1	Elephant	15
303	1970	January	Fixed-wing	-18.7147	34.5344	1	1	Elephant	50
304	1970	January	Fixed-wing	-18.7314	34.562	1	1	Elephant	7
305	1970	January	Fixed-wing	-18.7336	34.5359	1	1	Elephant	10
306	1970	January	Fixed-wing	-18.7408	34.5141	1	1	Elephant	1
307	1970	January	Fixed-wing	-18.7183	34.4909	1	1	Elephant	5
308	1970	January	Fixed-wing	-18.7336	34.4888	1	1	Elephant	3
309	1970	January	Fixed-wing	-18.6821	34.2668	1	0	Elephant	8
310	1970	January	Fixed-wing	-18.677	34.3466	1	1	Elephant	2
311	1970	January	Fixed-wing	-18.6922	34.3495	1	1	Elephant	1
312	1970	January	Fixed-wing	-18.7198	34.3074	1	0	Elephant	1
313	1970	January	Fixed-wing	-18.7132	34.3147	1	1	Elephant	1
314	1970	January	Fixed-wing	-18.7169	34.3277	1	1	Elephant	1
315	1970	January	Fixed-wing	-18.7111	34.3357	1	1	Elephant	4
316	1970	January	Fixed-wing	-18.714	34.3509	1	1	Elephant	3
317	1970	January	Fixed-wing	-18.7336	34.3778	1	1	Elephant	1
318	1970	January	Fixed-wing	-18.7357	34.4184	1	1	Elephant	6
319	1970	January	Fixed-wing	-18.7336	34.4387	1	1	Elephant	2
320	1970	January	Fixed-wing	-18.7662	34.4053	1	1	Elephant	116
321	1970	January	Fixed-wing	-18.7814	34.2704	1	0	Elephant	3
322	1970	January	Fixed-wing	-18.78	34.2835	1	1	Elephant	10
323	1970	January	Fixed-wing	-18.7887	34.2914	1	1	Elephant	4
324	1970	January	Fixed-wing	-18.8054	34.2748	1	1	Elephant	12
325	1970	January	Fixed-wing	-18.8322	34.2472	1	1	Elephant	12
326	1970	January	Fixed-wing	-18.8322	34.2856	1	1	Elephant	1
327	1970	January	Fixed-wing	-18.8279	34.298	1	1	Elephant	1
328	1970	January	Fixed-wing	-18.8474	34.3067	1	1	Elephant	6
329	1970	January	Fixed-wing	-18.8467	34.3212	1	1	Elephant	50
330	1970	January	Fixed-wing	-18.7517	34.335	1	1	Elephant	1
331	1970	January	Fixed-wing	-18.7829	34.3241	1	1	Elephant	15
332	1970	January	Fixed-wing	-18.8017	34.3604	1	1	Elephant	6
333	1970	January	Fixed-wing	-18.7996	34.3705	1	1	Elephant	5
334	1970	January	Fixed-wing	-18.8177	34.3654	1	1	Elephant	13
335	1970	January	Fixed-wing	-18.825	34.3582	1	1	Elephant	20
336	1970	January	Fixed-wing	-18.8467	34.3466	1	1	Elephant	10
337	1970	January	Fixed-wing	-18.8467	34.3582	1	1	Elephant	40
338	1970	January	Fixed-wing	-18.8641	34.2769	1	1	Elephant	15
339	1970	January	Fixed-wing	-18.8663	34.29	1	1	Elephant	6
340	1970	January	Fixed-wing	-18.8692	34.2994	1	1	Elephant	1
341	1970	January	Fixed-wing	-18.8764	34.2777	1	1	Elephant	10
342	1970	January	Fixed-wing	-18.8779	34.2864	1	1	Elephant	1
343	1970	January	Fixed-wing	-18.8786	34.2581	1	1	Elephant	5
344	1970	January	Fixed-wing	-18.8931	34.2385	1	1	Elephant	7
345	1970	January	Fixed-wing	-18.8997	34.2893	1	1	Elephant	1
346	1970	January	Fixed-wing	-18.8989	34.311	1	1	Elephant	1
347	1970	January	Fixed-wing	-18.92	34.261	1	0	Elephant	1
348	1970	January	Fixed-wing	-18.9193	34.2726	1	0	Elephant	5
349	1970	January	Fixed-wing	-18.9911	34.2334	1	0	Elephant	10
350	1970	January	Fixed-wing	-18.9794	34.2414	1	1	Elephant	2
351	1970	January	Fixed-wing	-18.9686	34.2487	1	1	Elephant	1
352	1970	January	Fixed-wing	-18.9773	34.2566	1	1	Elephant	1
353	1970	January	Fixed-wing	-18.9454	34.2733	1	1	Elephant	3
354	1970	January	Fixed-wing	-18.933	34.3081	1	1	Elephant	1
355	1970	January	Fixed-wing	-18.97	34.3125	1	1	Elephant	11
356	1970	January	Fixed-wing	-18.9635	34.3255	1	1	Elephant	14
357	1970	January	Fixed-wing	-19.0019	34.261	1	1	Elephant	2
358	1970	January	Fixed-wing	-19.0571	34.2429	1	1	Elephant	1
359	1970	January	Fixed-wing	-18.9867	34.3081	1	1	Elephant	1
360	1970	January	Fixed-wing	-18.9468	34.3451	1	1	Elephant	4
361	1970	January	Fixed-wing	-18.9584	34.3509	1	1	Elephant	1
362	1970	January	Fixed-wing	-18.9504	34.377	1	1	Elephant	5
363	1970	January	Fixed-wing	-18.9678	34.3778	1	1	Elephant	8
364	1970	January	Fixed-wing	-18.9773	34.3691	1	1	Elephant	1
365	1970	January	Fixed-wing	-18.9236	34.4075	1	1	Elephant	15
366	1970	January	Fixed-wing	-18.9163	34.4227	1	1	Elephant	1
367	1970	January	Fixed-wing	-18.9403	34.4198	1	1	Elephant	12
368	1970	January	Fixed-wing	-18.9425	34.4314	1	1	Elephant	28
369	1970	January	Fixed-wing	-18.9432	34.4489	1	1	Elephant	6
370	1970	January	Fixed-wing	-18.97	34.4256	1	1	Elephant	23
371	1970	January	Fixed-wing	-18.9628	34.4547	1	1	Elephant	10
372	1970	January	Fixed-wing	-18.9867	34.3865	1	1	Elephant	1
373	1970	January	Fixed-wing	-18.9983	34.4177	1	1	Elephant	17
374	1970	January	Fixed-wing	-18.9824	34.4271	1	1	Elephant	10
375	1970	January	Fixed-wing	-19.0085	34.4068	1	1	Elephant	5
376	1970	January	Fixed-wing	-19.0237	34.4148	1	1	Elephant	6
377	1970	January	Fixed-wing	-19.0281	34.3981	1	1	Elephant	30
378	1970	January	Fixed-wing	-19.0411	34.4075	1	1	Elephant	60
379	1970	January	Fixed-wing	-19.0447	34.4242	1	1	Elephant	13
380	1970	January	Fixed-wing	-19.0527	34.4191	1	1	Elephant	14
381	1970	January	Fixed-wing	-19.0447	34.4249	1	1	Elephant	30
382	1970	January	Fixed-wing	-19.0259	34.4568	1	1	Elephant	12
383	1970	January	Fixed-wing	-19.0513	34.4808	1	1	Elephant	14
384	1970	January	Fixed-wing	-19.0484	34.5428	1	1	Elephant	2
385	1970	January	Fixed-wing	-19.0206	34.5382	1	1	Elephant	1
386	1970	January	Fixed-wing	-19.0159	34.5068	1	1	Elephant	1
387	1970	January	Fixed-wing	-18.9179	34.5677	1	1	Elephant	1
388	1970	January	Fixed-wing	-18.9469	34.5625	1	1	Elephant	23
389	1970	January	Fixed-wing	-18.9596	34.5648	1	1	Elephant	3
390	1970	January	Fixed-wing	-18.9434	34.5329	1	1	Elephant	1
391	1970	January	Fixed-wing	-18.9486	34.5242	1	1	Elephant	1
392	1970	January	Fixed-wing	-18.9538	34.508	1	1	Elephant	5
393	1970	January	Fixed-wing	-18.9631	34.5062	1	1	Elephant	1
394	1970	January	Fixed-wing	-18.9701	34.5457	1	1	Elephant	11
395	1970	January	Fixed-wing	-18.9858	34.5294	1	1	Elephant	5
396	1970	January	Fixed-wing	-18.9852	34.5085	1	1	Elephant	2
397	1970	January	Fixed-wing	-18.9892	34.4929	1	1	Elephant	6
398	1970	January	Fixed-wing	-18.9863	34.4819	1	1	Elephant	14
399	1970	January	Fixed-wing	-18.9724	34.4523	1	1	Elephant	8
400	1970	January	Fixed-wing	-18.9811	34.4581	1	1	Elephant	8
401	1970	January	Fixed-wing	-18.9933	34.4418	1	1	Elephant	4
402	1970	January	Fixed-wing	-18.9956	34.4621	1	1	Elephant	20
403	1970	January	Fixed-wing	-19.0072	34.4662	1	1	Elephant	27
404	1970	January	Fixed-wing	-19.0043	34.4755	1	1	Elephant	60
405	1970	January	Fixed-wing	-19.0032	34.4848	1	1	Elephant	5
406	1970	January	Fixed-wing	-19.0061	34.4958	1	1	Elephant	2
407	1970	January	Fixed-wing	-19.0014	34.519	1	1	Elephant	3
408	1970	January	Fixed-wing	-18.2485	34.6305	1	0	Blue wildebeest	5
409	1970	January	Fixed-wing	-18.2703	34.6314	1	0	Blue wildebeest	20
410	1970	January	Fixed-wing	-18.2949	34.6811	1	0	Blue wildebeest	30
411	1970	January	Fixed-wing	-18.2967	34.7066	1	0	Blue wildebeest	1
412	1970	January	Fixed-wing	-18.307	34.6022	1	0	Blue wildebeest	20
413	1970	January	Fixed-wing	-18.358	34.5632	1	0	Blue wildebeest	46
414	1970	January	Fixed-wing	-18.359	34.7224	1	0	Blue wildebeest	40
415	1970	January	Fixed-wing	-18.3529	34.7312	1	0	Blue wildebeest	20
416	1970	January	Fixed-wing	-18.4462	34.5079	1	0	Blue wildebeest	10
417	1970	January	Fixed-wing	-18.4523	34.5534	1	0	Blue wildebeest	1
418	1970	January	Fixed-wing	-18.4704	34.5177	1	0	Blue wildebeest	20
419	1970	January	Fixed-wing	-18.4899	34.5288	1	0	Blue wildebeest	50
420	1970	January	Fixed-wing	-18.462	34.6059	1	0	Blue wildebeest	6
421	1970	January	Fixed-wing	-18.4681	34.6412	1	0	Blue wildebeest	6
422	1970	January	Fixed-wing	-18.5112	34.6565	1	0	Blue wildebeest	26
423	1970	January	Fixed-wing	-18.5623	34.6184	1	0	Blue wildebeest	14
424	1970	January	Fixed-wing	-18.5688	34.5729	1	0	Blue wildebeest	1
425	1970	January	Fixed-wing	-18.6022	34.4448	1	1	Blue wildebeest	20
426	1970	January	Fixed-wing	-18.624	34.4095	1	1	Blue wildebeest	16
427	1970	January	Fixed-wing	-18.6946	34.4982	1	1	Blue wildebeest	12
428	1970	January	Fixed-wing	-18.7498	34.4629	1	1	Blue wildebeest	20
429	1970	January	Fixed-wing	-18.7303	34.5293	1	1	Blue wildebeest	60
430	1970	January	Fixed-wing	-18.7392	34.5363	1	1	Blue wildebeest	70
431	1970	January	Fixed-wing	-18.7471	34.5418	1	1	Blue wildebeest	12
432	1970	January	Fixed-wing	-18.7498	34.5321	1	1	Blue wildebeest	30
433	1970	January	Fixed-wing	-18.7473	34.5546	1	1	Blue wildebeest	100
434	1970	January	Fixed-wing	-18.7517	34.5665	1	1	Blue wildebeest	2000
435	1970	January	Fixed-wing	-18.7603	34.5361	1	1	Blue wildebeest	80
436	1970	January	Fixed-wing	-18.7566	34.5238	1	1	Blue wildebeest	20
437	1970	January	Fixed-wing	-18.7781	34.5453	1	1	Blue wildebeest	200
438	1970	January	Fixed-wing	-18.7829	34.5372	1	1	Blue wildebeest	900
439	1970	January	Fixed-wing	-18.7844	34.5097	1	1	Blue wildebeest	20
440	1970	January	Fixed-wing	-18.7562	34.5026	1	1	Blue wildebeest	120
441	1970	January	Fixed-wing	-18.7491	34.5145	1	1	Blue wildebeest	30
442	1970	January	Fixed-wing	-18.8048	34.4974	1	1	Blue wildebeest	35
443	1970	January	Fixed-wing	-18.787	34.4206	1	1	Blue wildebeest	90
444	1970	January	Fixed-wing	-18.8178	34.3942	1	1	Blue wildebeest	3
445	1970	January	Fixed-wing	-18.8308	34.3923	1	1	Blue wildebeest	4
446	1970	January	Fixed-wing	-18.8386	34.4105	1	1	Blue wildebeest	100
447	1970	January	Fixed-wing	-18.8238	34.4213	1	1	Blue wildebeest	2250
448	1970	January	Fixed-wing	-18.8524	34.5554	1	1	Blue wildebeest	22
449	1970	January	Fixed-wing	-18.8817	34.3307	1	1	Blue wildebeest	10
450	1970	January	Fixed-wing	-18.8747	34.3418	1	1	Blue wildebeest	6
451	1970	January	Fixed-wing	-18.8839	34.3537	1	1	Blue wildebeest	15
452	1970	January	Fixed-wing	-18.8903	34.3749	1	1	Blue wildebeest	50
453	1970	January	Fixed-wing	-18.8814	34.4031	1	1	Blue wildebeest	1
454	1970	January	Fixed-wing	-18.9155	34.3233	1	1	Blue wildebeest	40
455	1970	January	Fixed-wing	-18.9211	34.3095	1	1	Blue wildebeest	2
456	1970	January	Fixed-wing	-18.943	34.3051	1	1	Blue wildebeest	1
457	1970	January	Fixed-wing	-18.969	34.2839	1	1	Blue wildebeest	5
458	1970	January	Fixed-wing	-18.9727	34.3054	1	1	Blue wildebeest	1
459	1970	January	Fixed-wing	-18.9779	34.3701	1	1	Blue wildebeest	2
460	1970	January	Fixed-wing	-18.9972	34.3229	1	1	Blue wildebeest	3
461	1970	January	Fixed-wing	-18.9772	34.4079	1	1	Blue wildebeest	15
462	1970	January	Fixed-wing	-18.9868	34.4042	1	1	Blue wildebeest	25
463	1970	January	Fixed-wing	-18.9274	34.3611	1	1	Blue wildebeest	5
464	1970	January	Fixed-wing	-18.9363	34.3541	1	1	Blue wildebeest	80
465	1970	January	Fixed-wing	-18.9241	34.399	1	1	Blue wildebeest	5
466	1970	January	Fixed-wing	-18.9218	34.4213	1	1	Blue wildebeest	50
467	1970	January	Fixed-wing	-18.9508	34.3819	1	1	Blue wildebeest	50
468	1970	January	Fixed-wing	-18.9348	34.4681	1	1	Blue wildebeest	12
469	1970	January	Fixed-wing	-18.9426	34.4532	1	1	Blue wildebeest	4
470	1970	January	Fixed-wing	-18.9523	34.4358	1	1	Blue wildebeest	40
471	1970	January	Fixed-wing	-18.9738	34.4339	1	1	Blue wildebeest	20
472	1970	January	Fixed-wing	-18.9608	34.4038	1	1	Blue wildebeest	15
473	1970	January	Fixed-wing	-19.037	34.5037	1	1	Blue wildebeest	15
474	1970	January	Fixed-wing	-19.0626	34.5153	1	1	Blue wildebeest	15
475	1970	January	Fixed-wing	-19.0808	34.5253	1	1	Blue wildebeest	3
476	1970	January	Fixed-wing	-19.054	34.5613	1	1	Blue wildebeest	10
477	1970	January	Fixed-wing	-19.0871	34.4993	1	1	Blue wildebeest	1
478	1970	January	Fixed-wing	-18.9058	34.2492	1	1	Blue wildebeest	30
479	1970	January	Fixed-wing	-18.3043	34.7977	1	0	Zebra	10
480	1970	January	Fixed-wing	-18.2683	34.5978	1	0	Zebra	3
481	1970	January	Fixed-wing	-18.2599	34.6271	1	0	Zebra	7
482	1970	January	Fixed-wing	-18.2688	34.6542	1	0	Zebra	22
483	1970	January	Fixed-wing	-18.2991	34.6396	1	0	Zebra	7
484	1970	January	Fixed-wing	-18.2865	34.6459	1	0	Zebra	60
485	1970	January	Fixed-wing	-18.2928	34.6599	1	0	Zebra	45
486	1970	January	Fixed-wing	-18.2928	34.7069	1	0	Zebra	16
487	1970	January	Fixed-wing	-18.309	34.6777	1	0	Zebra	25
488	1970	January	Fixed-wing	-18.3377	34.7038	1	0	Zebra	7
489	1970	January	Fixed-wing	-18.369	34.5472	1	0	Zebra	16
490	1970	January	Fixed-wing	-18.3596	34.5629	1	0	Zebra	100
491	1970	January	Fixed-wing	-18.381	34.5629	1	0	Zebra	6
492	1970	January	Fixed-wing	-18.3784	34.6448	1	0	Zebra	5
493	1970	January	Fixed-wing	-18.3648	34.7283	1	0	Zebra	10
494	1970	January	Fixed-wing	-18.4363	34.5686	1	0	Zebra	13
495	1970	January	Fixed-wing	-18.4175	34.6297	1	0	Zebra	4
496	1970	January	Fixed-wing	-18.442	34.6396	1	0	Zebra	6
497	1970	January	Fixed-wing	-18.4911	34.6459	1	0	Zebra	4
498	1970	January	Fixed-wing	-18.4859	34.6589	1	0	Zebra	70
499	1970	January	Fixed-wing	-18.549	34.6547	1	0	Zebra	5
500	1970	January	Fixed-wing	-18.4561	34.5196	1	0	Zebra	24
501	1970	January	Fixed-wing	-18.4707	34.5128	1	0	Zebra	20
502	1970	January	Fixed-wing	-18.4707	34.5279	1	0	Zebra	18
503	1970	January	Fixed-wing	-18.4734	34.6025	1	0	Zebra	20
504	1970	January	Fixed-wing	-18.4864	34.5916	1	0	Zebra	20
505	1970	January	Fixed-wing	-18.4974	34.5764	1	0	Zebra	11
506	1970	January	Fixed-wing	-18.477	34.5592	1	0	Zebra	6
507	1970	January	Fixed-wing	-18.488	34.5446	1	0	Zebra	20
508	1970	January	Fixed-wing	-18.5083	34.4736	1	0	Zebra	10
509	1970	January	Fixed-wing	-18.5198	34.4715	1	0	Zebra	4
510	1970	January	Fixed-wing	-18.5156	34.6041	1	0	Zebra	100
511	1970	January	Fixed-wing	-18.5255	34.601	1	0	Zebra	40
512	1970	January	Fixed-wing	-18.5454	34.5968	1	0	Zebra	22
513	1970	January	Fixed-wing	-18.549	34.5717	1	0	Zebra	6
514	1970	January	Fixed-wing	-18.6712	34.5023	1	1	Zebra	20
515	1970	January	Fixed-wing	-18.7385	34.5383	1	1	Zebra	8
516	1970	January	Fixed-wing	-18.7489	34.5378	1	1	Zebra	8
517	1970	January	Fixed-wing	-18.7583	34.5488	1	1	Zebra	20
518	1970	January	Fixed-wing	-18.7604	34.4867	1	1	Zebra	6
519	1970	January	Fixed-wing	-18.7547	34.5029	1	1	Zebra	30
520	1970	January	Fixed-wing	-18.7604	34.519	1	1	Zebra	20
521	1970	January	Fixed-wing	-18.7656	34.5081	1	1	Zebra	20
522	1970	January	Fixed-wing	-18.7719	34.4992	1	1	Zebra	15
523	1970	January	Fixed-wing	-18.7776	34.5128	1	1	Zebra	50
524	1970	January	Fixed-wing	-18.7672	34.531	1	1	Zebra	100
525	1970	January	Fixed-wing	-18.7641	34.5394	1	1	Zebra	100
526	1970	January	Fixed-wing	-18.7797	34.5342	1	1	Zebra	200
527	1970	January	Fixed-wing	-18.7729	34.5467	1	1	Zebra	800
528	1970	January	Fixed-wing	-18.7573	34.447	1	1	Zebra	10
529	1970	January	Fixed-wing	-18.7782	34.4308	1	1	Zebra	30
530	1970	January	Fixed-wing	-18.8084	34.4606	1	1	Zebra	11
531	1970	January	Fixed-wing	-18.8152	34.435	1	1	Zebra	325
532	1970	January	Fixed-wing	-18.8053	34.5655	1	1	Zebra	24
533	1970	January	Fixed-wing	-18.8157	34.553	1	1	Zebra	9
534	1970	January	Fixed-wing	-18.833	34.555	1	1	Zebra	7
535	1970	January	Fixed-wing	-18.8324	34.5791	1	1	Zebra	16
536	1970	January	Fixed-wing	-18.8277	34.388	1	1	Zebra	5
537	1970	January	Fixed-wing	-18.8356	34.3713	1	1	Zebra	7
538	1970	January	Fixed-wing	-18.8512	34.3823	1	1	Zebra	50
539	1970	January	Fixed-wing	-18.8695	34.554	1	1	Zebra	5
540	1970	January	Fixed-wing	-18.8862	34.5462	1	1	Zebra	2
541	1970	January	Fixed-wing	-18.9065	34.5535	1	1	Zebra	13
542	1970	January	Fixed-wing	-18.9144	34.5676	1	1	Zebra	8
543	1970	January	Fixed-wing	-18.917	34.5791	1	1	Zebra	4
544	1970	January	Fixed-wing	-18.9206	34.555	1	1	Zebra	10
545	1970	January	Fixed-wing	-18.9316	34.554	1	1	Zebra	30
546	1970	January	Fixed-wing	-18.9295	34.5634	1	1	Zebra	7
547	1970	January	Fixed-wing	-18.9441	34.5368	1	1	Zebra	5
548	1970	January	Fixed-wing	-19.0318	34.5102	1	1	Zebra	8
549	1970	January	Fixed-wing	-19.049	34.5618	1	1	Zebra	10
550	1970	January	Fixed-wing	-18.8523	34.3108	1	1	Zebra	100
551	1970	January	Fixed-wing	-18.8716	34.3291	1	1	Zebra	6
552	1970	January	Fixed-wing	-18.8893	34.3296	1	1	Zebra	25
553	1970	January	Fixed-wing	-18.8961	34.3077	1	1	Zebra	25
554	1970	January	Fixed-wing	-18.9149	34.3312	1	1	Zebra	24
555	1970	January	Fixed-wing	-18.9144	34.3411	1	1	Zebra	5
556	1970	January	Fixed-wing	-18.9285	34.3452	1	1	Zebra	7
557	1970	January	Fixed-wing	-18.9358	34.3552	1	1	Zebra	7
558	1970	January	Fixed-wing	-18.9311	34.3604	1	1	Zebra	15
559	1970	January	Fixed-wing	-18.8804	34.364	1	1	Zebra	30
560	1970	January	Fixed-wing	-18.8893	34.3865	1	1	Zebra	80
561	1970	January	Fixed-wing	-18.9368	34.3854	1	1	Zebra	20
562	1970	January	Fixed-wing	-18.9253	34.4006	1	1	Zebra	6
563	1970	January	Fixed-wing	-18.9399	34.4152	1	1	Zebra	6
564	1970	January	Fixed-wing	-18.9629	34.4073	1	1	Zebra	4
565	1970	January	Fixed-wing	-18.9519	34.4387	1	1	Zebra	20
566	1970	January	Fixed-wing	-18.9754	34.4251	1	1	Zebra	11
567	1970	January	Fixed-wing	-18.978	34.4413	1	1	Zebra	20
568	1970	January	Fixed-wing	-19.0041	34.3813	1	1	Zebra	5
569	1970	January	Fixed-wing	-18.989	34.411	1	1	Zebra	15
570	1970	January	Fixed-wing	-19.001	34.4308	1	1	Zebra	15
571	1970	January	Fixed-wing	-19.0287	34.4413	1	1	Zebra	28
572	1970	January	Fixed-wing	-18.9733	34.458	1	1	Zebra	28
573	1970	January	Fixed-wing	-18.4905	34.515	1	0	Zebra	120
574	1970	January	Fixed-wing	-18.7814	34.5524	1	1	Zebra	200
575	1970	January	Fixed-wing	-18.2655	34.6649	1	0	Eland	3
576	1970	January	Fixed-wing	-18.3682	34.429	1	0	Eland	6
577	1970	January	Fixed-wing	-18.372	34.5824	1	0	Eland	5
578	1970	January	Fixed-wing	-18.3956	34.7482	1	0	Eland	20
579	1970	January	Fixed-wing	-18.4389	34.5316	1	0	Eland	10
580	1970	January	Fixed-wing	-18.4413	34.5675	1	0	Eland	5
581	1970	January	Fixed-wing	-18.4447	34.5803	1	0	Eland	1
582	1970	January	Fixed-wing	-18.4664	34.5302	1	0	Eland	6
583	1970	January	Fixed-wing	-18.4762	34.6181	1	0	Eland	6
584	1970	January	Fixed-wing	-18.4939	34.6284	1	0	Eland	7
585	1970	January	Fixed-wing	-18.5125	34.6176	1	0	Eland	15
586	1970	January	Fixed-wing	-18.5047	34.4408	1	0	Eland	1
587	1970	January	Fixed-wing	-18.513	34.4855	1	0	Eland	1
588	1970	January	Fixed-wing	-18.596	34.5174	1	0	Eland	1
589	1970	January	Fixed-wing	-18.5258	34.5842	1	0	Eland	20
590	1970	January	Fixed-wing	-18.5042	34.6682	1	0	Eland	11
591	1970	January	Fixed-wing	-18.5145	34.6687	1	0	Eland	3
592	1970	January	Fixed-wing	-18.5228	34.6151	1	0	Eland	25
593	1970	January	Fixed-wing	-18.6328	34.4624	1	1	Eland	27
594	1970	January	Fixed-wing	-18.6574	34.5135	1	1	Eland	7
595	1970	January	Fixed-wing	-18.6795	34.4398	1	1	Eland	1
596	1970	January	Fixed-wing	-18.6761	34.4094	1	1	Eland	7
597	1970	January	Fixed-wing	-18.7099	34.3573	1	1	Eland	2
598	1970	January	Fixed-wing	-18.79	34.4379	1	1	Eland	11
599	1970	January	Fixed-wing	-18.817	34.4099	1	1	Eland	4
600	1970	January	Fixed-wing	-18.7173	34.5145	1	1	Eland	8
601	1970	January	Fixed-wing	-18.7384	34.514	1	1	Eland	4
602	1970	January	Fixed-wing	-18.7841	34.4727	1	1	Eland	24
603	1970	January	Fixed-wing	-18.7993	34.4958	1	1	Eland	10
604	1970	January	Fixed-wing	-18.7615	34.57	1	1	Eland	50
605	1970	January	Fixed-wing	-18.8332	34.5729	1	1	Eland	37
606	1970	January	Fixed-wing	-18.8592	34.5611	1	1	Eland	3
607	1970	January	Fixed-wing	-18.8283	34.3146	1	1	Eland	6
608	1970	January	Fixed-wing	-18.8577	34.3102	1	1	Eland	40
609	1970	January	Fixed-wing	-18.842	34.3824	1	1	Eland	5
610	1970	January	Fixed-wing	-18.9098	34.3313	1	1	Eland	7
611	1970	January	Fixed-wing	-18.9299	34.3927	1	1	Eland	8
612	1970	January	Fixed-wing	-18.9162	34.4221	1	1	Eland	5
613	1970	January	Fixed-wing	-19.064	34.5233	1	1	Eland	12
614	1970	January	Fixed-wing	-19.0748	34.5361	1	1	Eland	5
615	1970	January	Fixed-wing	-18.2456	34.5102	1	0	Hartebeest	12
616	1970	January	Fixed-wing	-18.2416	34.6202	1	0	Hartebeest	8
617	1970	January	Fixed-wing	-18.2593	34.6079	1	0	Hartebeest	1
618	1970	January	Fixed-wing	-18.2598	34.6241	1	0	Hartebeest	14
619	1970	January	Fixed-wing	-18.2672	34.6408	1	0	Hartebeest	25
620	1970	January	Fixed-wing	-18.2755	34.6757	1	0	Hartebeest	2
621	1970	January	Fixed-wing	-18.278	34.739	1	0	Hartebeest	3
622	1970	January	Fixed-wing	-18.2795	34.7508	1	0	Hartebeest	20
623	1970	January	Fixed-wing	-18.2952	34.766	1	0	Hartebeest	4
624	1970	January	Fixed-wing	-18.2922	34.7154	1	0	Hartebeest	14
625	1970	January	Fixed-wing	-18.3079	34.7257	1	0	Hartebeest	1
626	1970	January	Fixed-wing	-18.3163	34.742	1	0	Hartebeest	3
627	1970	January	Fixed-wing	-18.362	34.7979	1	0	Hartebeest	12
628	1970	January	Fixed-wing	-18.3114	34.6192	1	0	Hartebeest	5
629	1970	January	Fixed-wing	-18.3639	34.5986	1	0	Hartebeest	12
630	1970	January	Fixed-wing	-18.3683	34.6192	1	0	Hartebeest	6
631	1970	January	Fixed-wing	-18.3998	34.7061	1	0	Hartebeest	5
632	1970	January	Fixed-wing	-18.4086	34.5765	1	0	Hartebeest	7
633	1970	January	Fixed-wing	-18.4081	34.5927	1	0	Hartebeest	5
634	1970	January	Fixed-wing	-18.4282	34.5995	1	0	Hartebeest	12
635	1970	January	Fixed-wing	-18.44	34.5892	1	0	Hartebeest	14
636	1970	January	Fixed-wing	-18.4194	34.4935	1	0	Hartebeest	6
637	1970	January	Fixed-wing	-18.4371	34.493	1	0	Hartebeest	13
638	1970	January	Fixed-wing	-18.4351	34.5279	1	0	Hartebeest	5
639	1970	January	Fixed-wing	-18.4302	34.5426	1	0	Hartebeest	10
640	1970	January	Fixed-wing	-18.4297	34.5593	1	0	Hartebeest	6
641	1970	January	Fixed-wing	-18.4508	34.5573	1	0	Hartebeest	1
642	1970	January	Fixed-wing	-18.4233	34.6393	1	0	Hartebeest	3
643	1970	January	Fixed-wing	-18.5107	34.5843	1	0	Hartebeest	10
644	1970	January	Fixed-wing	-18.5274	34.575	1	0	Hartebeest	10
645	1970	January	Fixed-wing	-18.5417	34.5819	1	0	Hartebeest	8
646	1970	January	Fixed-wing	-18.469	34.4139	1	0	Hartebeest	2
647	1970	January	Fixed-wing	-18.4749	34.4581	1	0	Hartebeest	6
648	1970	January	Fixed-wing	-18.4577	34.4679	1	0	Hartebeest	8
649	1970	January	Fixed-wing	-18.4769	34.5028	1	0	Hartebeest	6
650	1970	January	Fixed-wing	-18.468	34.5146	1	0	Hartebeest	7
651	1970	January	Fixed-wing	-18.4744	34.5455	1	0	Hartebeest	12
652	1970	January	Fixed-wing	-18.5648	34.6143	1	0	Hartebeest	16
653	1970	January	Fixed-wing	-18.5068	34.3628	1	0	Hartebeest	9
654	1970	January	Fixed-wing	-18.5117	34.4257	1	0	Hartebeest	7
655	1970	January	Fixed-wing	-18.5564	34.3992	1	0	Hartebeest	12
656	1970	January	Fixed-wing	-18.5775	34.3712	1	0	Hartebeest	3
657	1970	January	Fixed-wing	-18.5932	34.3653	1	0	Hartebeest	4
658	1970	January	Fixed-wing	-18.5314	34.493	1	0	Hartebeest	3
659	1970	January	Fixed-wing	-18.5422	34.4753	1	0	Hartebeest	9
660	1970	January	Fixed-wing	-18.5662	34.4625	1	0	Hartebeest	6
661	1970	January	Fixed-wing	-18.5785	34.4669	1	0	Hartebeest	6
662	1970	January	Fixed-wing	-18.5932	34.4483	1	0	Hartebeest	6
663	1970	January	Fixed-wing	-18.581	34.5652	1	0	Hartebeest	2
664	1970	January	Fixed-wing	-18.5854	34.5166	1	0	Hartebeest	6
665	1970	January	Fixed-wing	-18.6202	34.5495	1	0	Hartebeest	2
666	1970	January	Fixed-wing	-18.6242	34.4974	1	0	Hartebeest	7
667	1970	January	Fixed-wing	-18.6659	34.3132	1	0	Hartebeest	11
668	1970	January	Fixed-wing	-18.9837	34.2003	1	0	Hartebeest	3
669	1970	January	Fixed-wing	-18.5918	34.3987	1	1	Hartebeest	3
670	1970	January	Fixed-wing	-18.6085	34.4164	1	1	Hartebeest	16
671	1970	January	Fixed-wing	-18.6094	34.4291	1	1	Hartebeest	4
672	1970	January	Fixed-wing	-18.6109	34.4507	1	1	Hartebeest	14
673	1970	January	Fixed-wing	-18.6438	34.4723	1	1	Hartebeest	4
674	1970	January	Fixed-wing	-18.6595	34.4444	1	1	Hartebeest	4
675	1970	January	Fixed-wing	-18.6748	34.4694	1	1	Hartebeest	16
676	1970	January	Fixed-wing	-18.6964	34.4979	1	1	Hartebeest	10
677	1970	January	Fixed-wing	-18.6772	34.52	1	1	Hartebeest	3
678	1970	January	Fixed-wing	-18.688	34.5681	1	1	Hartebeest	11
679	1970	January	Fixed-wing	-18.6532	34.3697	1	1	Hartebeest	15
680	1970	January	Fixed-wing	-18.6674	34.3849	1	1	Hartebeest	3
681	1970	January	Fixed-wing	-18.6983	34.4507	1	1	Hartebeest	10
682	1970	January	Fixed-wing	-18.7106	34.4498	1	1	Hartebeest	1
683	1970	January	Fixed-wing	-18.7086	34.4095	1	1	Hartebeest	7
684	1970	January	Fixed-wing	-18.7352	34.3756	1	1	Hartebeest	33
685	1970	January	Fixed-wing	-18.7872	34.3825	1	1	Hartebeest	9
686	1970	January	Fixed-wing	-18.8088	34.2872	1	1	Hartebeest	14
687	1970	January	Fixed-wing	-18.8088	34.3034	1	1	Hartebeest	7
688	1970	January	Fixed-wing	-18.8187	34.298	1	1	Hartebeest	14
689	1970	January	Fixed-wing	-18.8123	34.3299	1	1	Hartebeest	1
690	1970	January	Fixed-wing	-18.8398	34.3	1	1	Hartebeest	17
691	1970	January	Fixed-wing	-18.8481	34.3064	1	1	Hartebeest	8
692	1970	January	Fixed-wing	-18.8707	34.3309	1	1	Hartebeest	16
693	1970	January	Fixed-wing	-18.8727	34.3452	1	1	Hartebeest	11
694	1970	January	Fixed-wing	-18.8854	34.3206	1	1	Hartebeest	11
695	1970	January	Fixed-wing	-18.8825	34.2538	1	1	Hartebeest	4
696	1970	January	Fixed-wing	-18.8776	34.2735	1	1	Hartebeest	12
697	1970	January	Fixed-wing	-18.8977	34.2897	1	1	Hartebeest	5
698	1970	January	Fixed-wing	-18.9065	34.2818	1	1	Hartebeest	7
699	1970	January	Fixed-wing	-18.9395	34.2376	1	1	Hartebeest	8
700	1970	January	Fixed-wing	-18.9586	34.2543	1	1	Hartebeest	1
701	1970	January	Fixed-wing	-18.9448	34.297	1	1	Hartebeest	11
702	1970	January	Fixed-wing	-18.9581	34.299	1	1	Hartebeest	9
703	1970	January	Fixed-wing	-18.9723	34.2852	1	1	Hartebeest	11
704	1970	January	Fixed-wing	-19.0504	34.2273	1	1	Hartebeest	9
705	1970	January	Fixed-wing	-19.0499	34.2538	1	1	Hartebeest	6
706	1970	January	Fixed-wing	-19.0617	34.2592	1	1	Hartebeest	6
707	1970	January	Fixed-wing	-19.0077	34.2936	1	1	Hartebeest	7
708	1970	January	Fixed-wing	-18.9812	34.3707	1	1	Hartebeest	2
709	1970	January	Fixed-wing	-18.9645	34.3962	1	1	Hartebeest	5
710	1970	January	Fixed-wing	-18.9856	34.4193	1	1	Hartebeest	10
711	1970	January	Fixed-wing	-19.0136	34.5264	1	1	Hartebeest	15
712	1970	January	Fixed-wing	-19.0382	34.4473	1	1	Hartebeest	7
713	1970	January	Fixed-wing	-19.0499	34.4576	1	1	Hartebeest	11
714	1970	January	Fixed-wing	-19.074	34.4915	1	1	Hartebeest	10
715	1970	January	Fixed-wing	-18.4484	34.6938	1	0	Hartebeest	8
716	1970	January	Fixed-wing	-18.8128	34.3805	1	1	Hartebeest	3
717	1970	January	Fixed-wing	-18.2421	34.5534	1	0	Sable	10
718	1970	January	Fixed-wing	-18.2505	34.6324	1	0	Sable	22
719	1970	January	Fixed-wing	-18.2686	34.6256	1	0	Sable	1
720	1970	January	Fixed-wing	-18.2927	34.6766	1	0	Sable	19
721	1970	January	Fixed-wing	-18.2844	34.6938	1	0	Sable	42
722	1970	January	Fixed-wing	-18.3163	34.7965	1	0	Sable	4
723	1970	January	Fixed-wing	-18.4086	34.6487	1	0	Sable	15
724	1970	January	Fixed-wing	-18.5004	34.5637	1	0	Sable	8
725	1970	January	Fixed-wing	-18.5098	34.5509	1	0	Sable	2
726	1970	January	Fixed-wing	-18.5412	34.5823	1	0	Sable	5
727	1970	January	Fixed-wing	-18.5363	34.5927	1	0	Sable	3
728	1970	January	Fixed-wing	-18.5235	34.6261	1	0	Sable	1
729	1970	January	Fixed-wing	-18.5093	34.6393	1	0	Sable	1
730	1970	January	Fixed-wing	-18.552	34.632	1	0	Sable	10
731	1970	January	Fixed-wing	-18.5982	34.6275	1	0	Sable	8
732	1970	January	Fixed-wing	-18.6468	34.5475	1	0	Sable	1
733	1970	January	Fixed-wing	-18.581	34.3854	1	0	Sable	30
734	1970	January	Fixed-wing	-18.6924	34.2745	1	0	Sable	10
735	1970	January	Fixed-wing	-18.8073	34.2587	1	0	Sable	1
736	1970	January	Fixed-wing	-18.6217	34.4468	1	1	Sable	2
737	1970	January	Fixed-wing	-18.6257	34.4611	1	1	Sable	34
738	1970	January	Fixed-wing	-18.6664	34.4188	1	1	Sable	1
739	1970	January	Fixed-wing	-18.6895	34.4056	1	1	Sable	1
740	1970	January	Fixed-wing	-18.7376	34.4493	1	1	Sable	2
741	1970	January	Fixed-wing	-18.7332	34.5082	1	1	Sable	28
742	1970	January	Fixed-wing	-18.8039	34.2745	1	1	Sable	1
743	1970	January	Fixed-wing	-18.797	34.3039	1	1	Sable	14
744	1970	January	Fixed-wing	-18.8388	34.3486	1	1	Sable	3
745	1970	January	Fixed-wing	-18.8491	34.3545	1	1	Sable	30
746	1970	January	Fixed-wing	-18.8982	34.3132	1	1	Sable	1
747	1970	January	Fixed-wing	-18.939	34.2946	1	1	Sable	10
748	1970	January	Fixed-wing	-18.9385	34.3073	1	1	Sable	4
749	1970	January	Fixed-wing	-19.0097	34.2872	1	1	Sable	3
750	1970	January	Fixed-wing	-19.0514	34.2528	1	1	Sable	1
751	1970	January	Fixed-wing	-18.9817	34.3795	1	1	Sable	14
752	1970	January	Fixed-wing	-19.0151	34.4119	1	1	Sable	7
753	1970	January	Fixed-wing	-19.0445	34.4404	1	1	Sable	1
754	1970	January	Fixed-wing	-18.9404	34.4959	1	1	Sable	9
755	1970	January	Fixed-wing	-18.9684	34.5357	1	1	Sable	1
756	1970	January	Fixed-wing	-18.3012	34.7888	1	0	Waterbuck	18
757	1970	January	Fixed-wing	-18.3047	34.8184	1	0	Waterbuck	80
758	1970	January	Fixed-wing	-18.4289	34.6972	1	0	Waterbuck	5
759	1970	January	Fixed-wing	-18.5321	34.6594	1	0	Waterbuck	30
760	1970	January	Fixed-wing	-18.5403	34.6612	1	0	Waterbuck	20
761	1970	January	Fixed-wing	-18.5495	34.6571	1	0	Waterbuck	5
762	1970	January	Fixed-wing	-18.5542	34.5149	1	0	Waterbuck	5
763	1970	January	Fixed-wing	-18.661	34.5718	1	0	Waterbuck	6
764	1970	January	Fixed-wing	-18.6372	34.407	1	1	Waterbuck	6
765	1970	January	Fixed-wing	-18.6955	34.3611	1	1	Waterbuck	6
766	1970	January	Fixed-wing	-18.7252	34.3967	1	1	Waterbuck	2
767	1970	January	Fixed-wing	-18.7363	34.4023	1	1	Waterbuck	5
768	1970	January	Fixed-wing	-18.7051	34.4502	1	1	Waterbuck	6
769	1970	January	Fixed-wing	-18.7638	34.5743	1	1	Waterbuck	45
770	1970	January	Fixed-wing	-18.7501	34.5869	1	1	Waterbuck	16
771	1970	January	Fixed-wing	-18.7601	34.6017	1	1	Waterbuck	8
772	1970	January	Fixed-wing	-18.769	34.5958	1	1	Waterbuck	5
773	1970	January	Fixed-wing	-18.756	34.5594	1	1	Waterbuck	11
774	1970	January	Fixed-wing	-18.7675	34.5564	1	1	Waterbuck	20
775	1970	January	Fixed-wing	-18.7768	34.5542	1	1	Waterbuck	200
776	1970	January	Fixed-wing	-18.7325	34.49	1	1	Waterbuck	20
777	1970	January	Fixed-wing	-18.7365	34.5163	1	1	Waterbuck	15
778	1970	January	Fixed-wing	-18.7399	34.4937	1	1	Waterbuck	15
779	1970	January	Fixed-wing	-18.7483	34.4875	1	1	Waterbuck	9
780	1970	January	Fixed-wing	-18.7501	34.4984	1	1	Waterbuck	5
781	1970	January	Fixed-wing	-18.7498	34.4456	1	1	Waterbuck	5
782	1970	January	Fixed-wing	-18.7514	34.4596	1	1	Waterbuck	12
783	1970	January	Fixed-wing	-18.7526	34.4707	1	1	Waterbuck	20
784	1970	January	Fixed-wing	-18.7622	34.4683	1	1	Waterbuck	20
785	1970	January	Fixed-wing	-18.7594	34.4776	1	1	Waterbuck	5
786	1970	January	Fixed-wing	-18.7588	34.489	1	1	Waterbuck	20
787	1970	January	Fixed-wing	-18.7681	34.4317	1	1	Waterbuck	6
788	1970	January	Fixed-wing	-18.779	34.4289	1	1	Waterbuck	20
789	1970	January	Fixed-wing	-18.7768	34.454	1	1	Waterbuck	51
790	1970	January	Fixed-wing	-18.7945	34.449	1	1	Waterbuck	20
791	1970	January	Fixed-wing	-18.7669	34.5008	1	1	Waterbuck	10
792	1970	January	Fixed-wing	-18.7697	34.5108	1	1	Waterbuck	8
793	1970	January	Fixed-wing	-18.7765	34.4959	1	1	Waterbuck	4
794	1970	January	Fixed-wing	-18.7833	34.5002	1	1	Waterbuck	15
795	1970	January	Fixed-wing	-18.7777	34.5145	1	1	Waterbuck	50
796	1970	January	Fixed-wing	-18.7783	34.5269	1	1	Waterbuck	100
797	1970	January	Fixed-wing	-18.7718	34.5349	1	1	Waterbuck	82
798	1970	January	Fixed-wing	-18.7814	34.5374	1	1	Waterbuck	52
799	1970	January	Fixed-wing	-18.7966	34.4776	1	1	Waterbuck	60
800	1970	January	Fixed-wing	-18.7969	34.4894	1	1	Waterbuck	15
801	1970	January	Fixed-wing	-18.7979	34.5108	1	1	Waterbuck	30
802	1970	January	Fixed-wing	-18.8075	34.5104	1	1	Waterbuck	40
803	1970	January	Fixed-wing	-18.8044	34.5182	1	1	Waterbuck	60
804	1970	January	Fixed-wing	-18.7861	34.5222	1	1	Waterbuck	120
805	1970	January	Fixed-wing	-18.7948	34.5272	1	1	Waterbuck	50
806	1970	January	Fixed-wing	-18.8035	34.5294	1	1	Waterbuck	33
807	1970	January	Fixed-wing	-18.8143	34.5191	1	1	Waterbuck	8
808	1970	January	Fixed-wing	-18.814	34.5306	1	1	Waterbuck	22
809	1970	January	Fixed-wing	-18.8121	34.5458	1	1	Waterbuck	14
810	1970	January	Fixed-wing	-18.801	34.5616	1	1	Waterbuck	25
811	1970	January	Fixed-wing	-18.8258	34.5086	1	1	Waterbuck	25
812	1970	January	Fixed-wing	-18.8233	34.5269	1	1	Waterbuck	6
813	1970	January	Fixed-wing	-18.819	34.539	1	1	Waterbuck	60
814	1970	January	Fixed-wing	-18.8314	34.516	1	1	Waterbuck	3
815	1970	January	Fixed-wing	-18.8348	34.5284	1	1	Waterbuck	6
816	1970	January	Fixed-wing	-18.8311	34.5362	1	1	Waterbuck	30
817	1970	January	Fixed-wing	-18.8435	34.5318	1	1	Waterbuck	16
818	1970	January	Fixed-wing	-18.8264	34.5455	1	1	Waterbuck	2
819	1970	January	Fixed-wing	-18.8351	34.5449	1	1	Waterbuck	6
820	1970	January	Fixed-wing	-18.8323	34.557	1	1	Waterbuck	8
821	1970	January	Fixed-wing	-18.827	34.5672	1	1	Waterbuck	5
822	1970	January	Fixed-wing	-18.8428	34.5501	1	1	Waterbuck	22
823	1970	January	Fixed-wing	-18.8422	34.5616	1	1	Waterbuck	12
824	1970	January	Fixed-wing	-18.8413	34.5725	1	1	Waterbuck	12
825	1970	January	Fixed-wing	-18.8506	34.5908	1	1	Waterbuck	1
826	1970	January	Fixed-wing	-18.8608	34.5904	1	1	Waterbuck	1
827	1970	January	Fixed-wing	-18.8556	34.5241	1	1	Waterbuck	17
828	1970	January	Fixed-wing	-18.8599	34.5408	1	1	Waterbuck	12
829	1970	January	Fixed-wing	-18.8593	34.5598	1	1	Waterbuck	32
830	1970	January	Fixed-wing	-18.8714	34.5334	1	1	Waterbuck	17
831	1970	January	Fixed-wing	-18.827	34.3752	1	1	Waterbuck	15
832	1970	January	Fixed-wing	-18.8193	34.4004	1	1	Waterbuck	20
833	1970	January	Fixed-wing	-18.8742	34.3755	1	1	Waterbuck	50
834	1970	January	Fixed-wing	-18.8956	34.3526	1	1	Waterbuck	20
835	1970	January	Fixed-wing	-18.8934	34.4007	1	1	Waterbuck	130
836	1970	January	Fixed-wing	-18.9008	34.409	1	1	Waterbuck	12
837	1970	January	Fixed-wing	-18.9061	34.4177	1	1	Waterbuck	15
838	1970	January	Fixed-wing	-18.9384	34.4066	1	1	Waterbuck	3
839	1970	January	Fixed-wing	-18.9347	34.4186	1	1	Waterbuck	20
840	1970	January	Fixed-wing	-18.9288	34.4431	1	1	Waterbuck	9
841	1970	January	Fixed-wing	-18.957	34.4394	1	1	Waterbuck	6
842	1970	January	Fixed-wing	-18.9567	34.4478	1	1	Waterbuck	15
843	1970	January	Fixed-wing	-18.8915	34.5449	1	1	Waterbuck	9
844	1970	January	Fixed-wing	-18.925	34.5672	1	1	Waterbuck	6
845	1970	January	Fixed-wing	-19.0097	34.5278	1	1	Waterbuck	3
846	1970	January	Fixed-wing	-19.0082	34.5442	1	1	Waterbuck	8
847	1970	January	Fixed-wing	-18.9762	34.2924	1	1	Waterbuck	3
848	1970	January	Fixed-wing	-18.9517	34.3064	1	1	Waterbuck	3
849	1970	January	Fixed-wing	-19.0119	34.3827	1	1	Waterbuck	3
850	1970	January	Fixed-wing	-19.0466	34.4128	1	1	Waterbuck	2
851	1970	January	Fixed-wing	-19.0795	34.5129	1	1	Waterbuck	8
852	1970	January	Fixed-wing	-19.0885	34.5194	1	1	Waterbuck	14
853	1970	January	Fixed-wing	-19.0692	34.5504	1	1	Waterbuck	16
854	1972	October	Fixed-wing	-18.4564	34.4345	1	0	Buffalo	1001
855	1972	October	Fixed-wing	-18.4354	34.4806	1	0	Buffalo	10
856	1972	October	Fixed-wing	-18.4815	34.5256	1	0	Buffalo	10
857	1972	October	Fixed-wing	-18.4689	34.558	1	0	Buffalo	50
858	1972	October	Fixed-wing	-18.4867	34.5936	1	0	Buffalo	3
859	1972	October	Fixed-wing	-18.5055	34.5653	1	0	Buffalo	50
860	1972	October	Fixed-wing	-18.5286	34.5957	1	0	Buffalo	2210
861	1972	October	Fixed-wing	-18.5328	34.4816	1	0	Buffalo	500
862	1972	October	Fixed-wing	-18.5464	34.5004	1	0	Buffalo	122
863	1972	October	Fixed-wing	-18.5328	34.5433	1	0	Buffalo	520
864	1972	October	Fixed-wing	-18.5631	34.3801	1	0	Buffalo	100
865	1972	October	Fixed-wing	-18.5547	34.4157	1	0	Buffalo	2
866	1972	October	Fixed-wing	-18.5778	34.4691	1	0	Buffalo	50
867	1972	October	Fixed-wing	-18.5966	34.535	1	0	Buffalo	900
868	1972	October	Fixed-wing	-18.6217	34.5695	1	0	Buffalo	302
869	1972	October	Fixed-wing	-18.786	34.2054	1	0	Buffalo	150
870	1972	October	Fixed-wing	-18.7148	34.2336	1	0	Buffalo	82
871	1972	October	Fixed-wing	-18.7127	34.2943	1	0	Buffalo	1014
872	1972	October	Fixed-wing	-18.7316	34.3027	1	0	Buffalo	3
873	1972	October	Fixed-wing	-18.6625	34.3215	1	0	Buffalo	5
874	1972	October	Fixed-wing	-18.6018	34.377	1	0	Buffalo	2
875	1972	October	Fixed-wing	-19.0549	34.2556	1	1	Buffalo	261
876	1972	October	Fixed-wing	-19.0246	34.2566	1	1	Buffalo	150
877	1972	October	Fixed-wing	-18.9901	34.2859	1	1	Buffalo	490
878	1972	October	Fixed-wing	-18.652	34.3717	1	1	Buffalo	3
879	1972	October	Fixed-wing	-18.6615	34.4125	1	1	Buffalo	11
880	1972	October	Fixed-wing	-18.7012	34.4335	1	1	Buffalo	3
881	1972	October	Fixed-wing	-18.6875	34.3548	1	1	Buffalo	17
882	1972	October	Fixed-wing	-18.7227	34.374	1	1	Buffalo	220
883	1972	October	Fixed-wing	-18.7478	34.3205	1	1	Buffalo	15
884	1972	October	Fixed-wing	-18.7193	34.4284	1	1	Buffalo	900
885	1972	October	Fixed-wing	-18.7277	34.4485	1	1	Buffalo	10
886	1972	October	Fixed-wing	-18.757	34.4879	1	1	Buffalo	12
887	1972	October	Fixed-wing	-18.7696	34.4644	1	1	Buffalo	60
888	1972	October	Fixed-wing	-18.7018	34.6026	1	1	Buffalo	120
889	1972	October	Fixed-wing	-18.7285	34.6093	1	1	Buffalo	8
890	1972	October	Fixed-wing	-18.7796	34.5724	1	1	Buffalo	102
891	1972	October	Fixed-wing	-18.788	34.3606	1	1	Buffalo	60
892	1972	October	Fixed-wing	-18.8256	34.5239	1	1	Buffalo	5
893	1972	October	Fixed-wing	-18.8667	34.5247	1	1	Buffalo	120
894	1972	October	Fixed-wing	-18.8801	34.3841	1	1	Buffalo	3
895	1972	October	Fixed-wing	-18.8775	34.4084	1	1	Buffalo	16
896	1972	October	Fixed-wing	-18.9236	34.4008	1	1	Buffalo	5
897	1972	October	Fixed-wing	-18.9219	34.4352	1	1	Buffalo	4
898	1972	October	Fixed-wing	-18.891	34.4787	1	1	Buffalo	8
899	1972	October	Fixed-wing	-18.9219	34.5197	1	1	Buffalo	16
900	1972	October	Fixed-wing	-18.9847	34.544	1	1	Buffalo	2
901	1972	October	Fixed-wing	-19.0014	34.4527	1	1	Buffalo	9
902	1972	October	Fixed-wing	-19.0601	34.4469	1	1	Buffalo	800
903	1972	October	Fixed-wing	-19.0634	34.4812	1	1	Buffalo	300
904	1972	October	Fixed-wing	-19.0317	34.5679	1	1	Buffalo	70
905	1972	October	Fixed-wing	-19.0765	34.5652	1	1	Buffalo	80
906	1972	October	Fixed-wing	-19.0859	34.5384	1	1	Buffalo	220
907	1972	October	Fixed-wing	-19.0966	34.5277	1	1	Buffalo	480
908	1972	October	Fixed-wing	-19.1094	34.5224	1	1	Buffalo	78
909	1972	October	Fixed-wing	-19.112	34.5425	1	1	Buffalo	642
910	1972	October	Fixed-wing	-19.1187	34.5143	1	1	Buffalo	500
911	1972	October	Fixed-wing	-19.1301	34.5324	1	1	Buffalo	150
912	1972	October	Fixed-wing	-19.1449	34.5632	1	1	Buffalo	250
913	1969	October	Fixed-wing	-18.2915	34.79	1	0	Eland	1
914	1969	October	Fixed-wing	-18.3093	34.5889	1	0	Eland	38
915	1969	October	Fixed-wing	-18.3945	34.7012	1	0	Eland	3
916	1969	October	Fixed-wing	-18.5515	34.5768	1	0	Eland	20
917	1969	October	Fixed-wing	-18.5551	34.6322	1	0	Eland	35
918	1969	October	Fixed-wing	-18.5302	34.6678	1	0	Eland	90
919	1969	October	Fixed-wing	-18.6084	34.5306	1	0	Eland	34
920	1969	October	Fixed-wing	-18.5956	34.5903	1	0	Eland	28
921	1969	October	Fixed-wing	-18.6539	34.6081	1	0	Eland	15
922	1969	October	Fixed-wing	-18.8549	34.1939	1	0	Eland	2
923	1969	October	Fixed-wing	-18.6169	34.4035	1	1	Eland	7
924	1969	October	Fixed-wing	-18.6475	34.3963	1	1	Eland	20
925	1969	October	Fixed-wing	-18.6951	34.3793	1	1	Eland	7
926	1969	October	Fixed-wing	-18.6922	34.4226	1	1	Eland	30
927	1969	October	Fixed-wing	-18.877	34.25	1	1	Eland	12
928	1972	October	Fixed-wing	-18.4464	34.5001	1	0	Eland	1
929	1972	October	Fixed-wing	-18.5086	34.5301	1	0	Eland	22
930	1972	October	Fixed-wing	-18.5086	34.6422	1	0	Eland	30
931	1972	October	Fixed-wing	-18.5719	34.4057	1	0	Eland	9
932	1972	October	Fixed-wing	-18.5541	34.4968	1	0	Eland	2
933	1972	October	Fixed-wing	-18.6663	34.6133	1	0	Eland	41
934	1972	October	Fixed-wing	-18.7406	34.267	1	0	Eland	5
935	1972	October	Fixed-wing	-18.6863	34.3413	1	1	Eland	1
936	1972	October	Fixed-wing	-18.7284	34.3458	1	1	Eland	15
937	1972	October	Fixed-wing	-18.9949	34.5678	1	1	Eland	1
938	1969	October	Fixed-wing	-18.308	34.5451	1	0	Elephant	50
939	1969	October	Fixed-wing	-18.323	34.5539	1	0	Elephant	2
940	1969	October	Fixed-wing	-18.3609	34.5759	1	0	Elephant	25
941	1969	October	Fixed-wing	-18.3709	34.5739	1	0	Elephant	40
942	1969	October	Fixed-wing	-18.3699	34.5844	1	0	Elephant	74
943	1969	October	Fixed-wing	-18.397	34.5067	1	0	Elephant	22
944	1969	October	Fixed-wing	-18.3975	34.5253	1	0	Elephant	6
945	1969	October	Fixed-wing	-18.404	34.5543	1	0	Elephant	11
946	1969	October	Fixed-wing	-18.4005	34.5784	1	0	Elephant	27
947	1969	October	Fixed-wing	-18.3784	34.629	1	0	Elephant	43
948	1969	October	Fixed-wing	-18.4265	34.6185	1	0	Elephant	30
949	1969	October	Fixed-wing	-18.4371	34.6435	1	0	Elephant	4
950	1969	October	Fixed-wing	-18.4376	34.6591	1	0	Elephant	2
951	1969	October	Fixed-wing	-18.4516	34.6105	1	0	Elephant	33
952	1969	October	Fixed-wing	-18.4546	34.5644	1	0	Elephant	3
953	1969	October	Fixed-wing	-18.4651	34.5228	1	0	Elephant	12
954	1969	October	Fixed-wing	-18.4301	34.4721	1	0	Elephant	8
955	1969	October	Fixed-wing	-18.4656	34.4656	1	0	Elephant	2
956	1969	October	Fixed-wing	-18.4967	34.5468	1	0	Elephant	5
957	1969	October	Fixed-wing	-18.5017	34.5969	1	0	Elephant	70
958	1969	October	Fixed-wing	-18.5167	34.605	1	0	Elephant	15
959	1969	October	Fixed-wing	-18.5288	34.6195	1	0	Elephant	29
960	1969	October	Fixed-wing	-18.5132	34.4461	1	0	Elephant	5
961	1969	October	Fixed-wing	-18.5177	34.4601	1	0	Elephant	7
962	1969	October	Fixed-wing	-18.5057	34.4767	1	0	Elephant	8
963	1969	October	Fixed-wing	-18.5208	34.4762	1	0	Elephant	12
964	1969	October	Fixed-wing	-18.5162	34.4852	1	0	Elephant	20
965	1969	October	Fixed-wing	-18.5308	34.4887	1	0	Elephant	8
966	1969	October	Fixed-wing	-18.5558	34.6435	1	0	Elephant	5
967	1969	October	Fixed-wing	-18.5639	34.6425	1	0	Elephant	9
968	1969	October	Fixed-wing	-18.5704	34.5739	1	0	Elephant	10
969	1969	October	Fixed-wing	-18.5799	34.5769	1	0	Elephant	1
970	1969	October	Fixed-wing	-18.5769	34.5854	1	0	Elephant	7
971	1969	October	Fixed-wing	-18.5618	34.4636	1	0	Elephant	24
972	1969	October	Fixed-wing	-18.5719	34.4727	1	0	Elephant	16
973	1969	October	Fixed-wing	-18.5784	34.4641	1	0	Elephant	30
974	1969	October	Fixed-wing	-18.5879	34.4712	1	0	Elephant	2
975	1969	October	Fixed-wing	-18.5779	34.4952	1	0	Elephant	4
976	1969	October	Fixed-wing	-18.5879	34.5293	1	0	Elephant	7
977	1969	October	Fixed-wing	-18.617	34.5478	1	0	Elephant	2
978	1969	October	Fixed-wing	-18.6215	34.5594	1	0	Elephant	3
979	1969	October	Fixed-wing	-18.631	34.5699	1	0	Elephant	35
980	1969	October	Fixed-wing	-18.6415	34.5824	1	0	Elephant	15
981	1969	October	Fixed-wing	-18.6445	34.5919	1	0	Elephant	5
982	1969	October	Fixed-wing	-18.649	34.6004	1	0	Elephant	22
983	1969	October	Fixed-wing	-18.6551	34.5694	1	0	Elephant	80
984	1969	October	Fixed-wing	-18.6681	34.5654	1	0	Elephant	30
985	1969	October	Fixed-wing	-18.6731	34.5784	1	0	Elephant	16
986	1969	October	Fixed-wing	-18.6064	34.3689	1	0	Elephant	20
987	1969	October	Fixed-wing	-18.6049	34.3609	1	0	Elephant	1
988	1969	October	Fixed-wing	-18.614	34.3564	1	0	Elephant	30
989	1969	October	Fixed-wing	-18.633	34.3559	1	0	Elephant	14
990	1969	October	Fixed-wing	-18.6571	34.2907	1	0	Elephant	1
991	1969	October	Fixed-wing	-18.6716	34.2632	1	0	Elephant	7
992	1969	October	Fixed-wing	-18.6821	34.2642	1	0	Elephant	10
993	1969	October	Fixed-wing	-18.6947	34.2622	1	0	Elephant	15
994	1969	October	Fixed-wing	-18.7187	34.2436	1	0	Elephant	4
995	1969	October	Fixed-wing	-18.7232	34.2772	1	0	Elephant	10
996	1969	October	Fixed-wing	-18.7362	34.2817	1	0	Elephant	24
997	1969	October	Fixed-wing	-18.7678	34.2431	1	0	Elephant	4
998	1969	October	Fixed-wing	-18.7768	34.2742	1	0	Elephant	14
999	1969	October	Fixed-wing	-18.6746	34.3348	1	0	Elephant	20
1000	1969	October	Fixed-wing	-18.6962	34.3143	1	0	Elephant	38
1001	1969	October	Fixed-wing	-18.7052	34.3138	1	0	Elephant	5
1002	1969	October	Fixed-wing	-19.0099	34.2111	1	0	Elephant	15
1003	1969	October	Fixed-wing	-19.0064	34.2256	1	0	Elephant	15
1004	1969	October	Fixed-wing	-18.623	34.3789	1	1	Elephant	12
1005	1969	October	Fixed-wing	-18.624	34.3905	1	1	Elephant	14
1006	1969	October	Fixed-wing	-18.628	34.41	1	1	Elephant	17
1007	1969	October	Fixed-wing	-18.6335	34.3764	1	1	Elephant	10
1008	1969	October	Fixed-wing	-18.633	34.4892	1	1	Elephant	23
1009	1969	October	Fixed-wing	-18.6581	34.5198	1	1	Elephant	30
1010	1969	October	Fixed-wing	-18.6801	34.5709	1	1	Elephant	16
1011	1969	October	Fixed-wing	-18.6912	34.5789	1	1	Elephant	5
1012	1969	October	Fixed-wing	-18.6952	34.5904	1	1	Elephant	45
1013	1969	October	Fixed-wing	-18.6972	34.6035	1	1	Elephant	51
1014	1969	October	Fixed-wing	-18.7117	34.3258	1	1	Elephant	8
1015	1969	October	Fixed-wing	-18.7027	34.3343	1	1	Elephant	4
1016	1969	October	Fixed-wing	-18.6866	34.3363	1	1	Elephant	16
1017	1969	October	Fixed-wing	-18.6851	34.3559	1	1	Elephant	2
1018	1969	October	Fixed-wing	-18.6937	34.3559	1	1	Elephant	48
1019	1969	October	Fixed-wing	-18.7032	34.3654	1	1	Elephant	1
1020	1969	October	Fixed-wing	-18.7678	34.2917	1	1	Elephant	1
1021	1969	October	Fixed-wing	-18.7498	34.3228	1	1	Elephant	5
1022	1969	October	Fixed-wing	-18.7994	34.3123	1	1	Elephant	3
1023	1969	October	Fixed-wing	-18.7678	34.3845	1	1	Elephant	1
1024	1969	October	Fixed-wing	-18.7573	34.5027	1	1	Elephant	1
1025	1969	October	Fixed-wing	-18.8099	34.4441	1	1	Elephant	11
1026	1969	October	Fixed-wing	-18.8435	34.5052	1	1	Elephant	2
1027	1969	October	Fixed-wing	-18.7368	34.3093	1	1	Elephant	30
1028	1969	October	Fixed-wing	-18.7934	34.2767	1	1	Elephant	2
1029	1969	October	Fixed-wing	-18.8455	34.2963	1	1	Elephant	3
1030	1969	October	Fixed-wing	-18.8676	34.2436	1	1	Elephant	3
1031	1969	October	Fixed-wing	-18.9036	34.2922	1	1	Elephant	6
1032	1969	October	Fixed-wing	-18.8906	34.3118	1	1	Elephant	4
1033	1969	October	Fixed-wing	-18.9167	34.3228	1	1	Elephant	6
1034	1969	October	Fixed-wing	-18.9111	34.3484	1	1	Elephant	19
1035	1969	October	Fixed-wing	-18.9277	34.3699	1	1	Elephant	6
1036	1969	October	Fixed-wing	-18.8445	34.3749	1	1	Elephant	8
1037	1969	October	Fixed-wing	-18.8435	34.394	1	1	Elephant	20
1038	1969	October	Fixed-wing	-18.8685	34.419	1	1	Elephant	26
1039	1969	October	Fixed-wing	-18.8565	34.4651	1	1	Elephant	5
1040	1969	October	Fixed-wing	-18.8565	34.4792	1	1	Elephant	1
1041	1969	October	Fixed-wing	-18.856	34.4967	1	1	Elephant	20
1042	1969	October	Fixed-wing	-18.8791	34.4406	1	1	Elephant	7
1043	1969	October	Fixed-wing	-18.9086	34.4767	1	1	Elephant	1
1044	1969	October	Fixed-wing	-18.9372	34.419	1	1	Elephant	4
1045	1969	October	Fixed-wing	-18.9678	34.3559	1	1	Elephant	1
1046	1969	October	Fixed-wing	-18.9698	34.3759	1	1	Elephant	7
1047	1969	October	Fixed-wing	-18.9512	34.394	1	1	Elephant	5
1048	1969	October	Fixed-wing	-18.9588	34.2537	1	1	Elephant	5
1049	1969	October	Fixed-wing	-18.9753	34.2537	1	1	Elephant	12
1050	1969	October	Fixed-wing	-18.9803	34.2431	1	1	Elephant	6
1051	1969	October	Fixed-wing	-19.0199	34.2266	1	1	Elephant	3
1052	1969	October	Fixed-wing	-18.9989	34.2466	1	1	Elephant	7
1053	1969	October	Fixed-wing	-18.9863	34.2592	1	1	Elephant	2
1054	1969	October	Fixed-wing	-18.9968	34.2612	1	1	Elephant	3
1055	1969	October	Fixed-wing	-18.9643	34.2897	1	1	Elephant	24
1056	1969	October	Fixed-wing	-18.9918	34.2822	1	1	Elephant	3
1057	1969	October	Fixed-wing	-18.9863	34.2897	1	1	Elephant	1
1058	1969	October	Fixed-wing	-18.9893	34.3058	1	1	Elephant	1
1059	1969	October	Fixed-wing	-19.0054	34.2902	1	1	Elephant	6
1060	1969	October	Fixed-wing	-18.9948	34.3123	1	1	Elephant	5
1061	1969	October	Fixed-wing	-19.0134	34.4195	1	1	Elephant	1
1062	1969	October	Fixed-wing	-19.0465	34.4015	1	1	Elephant	1
1063	1969	October	Fixed-wing	-19.0319	34.4531	1	1	Elephant	22
1064	1969	October	Fixed-wing	-19.0299	34.4691	1	1	Elephant	4
1065	1969	October	Fixed-wing	-19.1136	34.5283	1	1	Elephant	2
1066	1969	October	Fixed-wing	-19.0415	34.5183	1	1	Elephant	4
1067	1969	October	Fixed-wing	-19.0249	34.4932	1	1	Elephant	2
1068	1969	October	Fixed-wing	-19.0049	34.4902	1	1	Elephant	3
1069	1969	October	Fixed-wing	-18.9923	34.5744	1	1	Elephant	4
1070	1969	October	Fixed-wing	-18.9923	34.5674	1	1	Elephant	7
1071	1969	October	Fixed-wing	-19.0019	34.5679	1	1	Elephant	1
1072	1969	October	Fixed-wing	-19.0139	34.5598	1	1	Elephant	7
1073	1969	October	Fixed-wing	-18.9563	34.428	1	1	Elephant	2
1074	1969	October	Fixed-wing	-18.9557	34.4416	1	1	Elephant	3
1075	1969	October	Fixed-wing	-18.9903	34.4371	1	1	Elephant	5
1076	1969	October	Fixed-wing	-18.9658	34.4691	1	1	Elephant	17
1077	1969	October	Fixed-wing	-18.9588	34.4807	1	1	Elephant	3
1078	1969	October	Fixed-wing	-18.9823	34.5353	1	1	Elephant	3
1079	1969	October	Fixed-wing	-18.9688	34.5383	1	1	Elephant	4
1080	1969	October	Fixed-wing	-18.9497	34.5138	1	1	Elephant	3
1081	1969	October	Fixed-wing	-18.9487	34.5293	1	1	Elephant	6
1082	1969	October	Fixed-wing	-18.9608	34.5223	1	1	Elephant	4
1083	1969	October	Fixed-wing	-18.9412	34.5358	1	1	Elephant	1
1084	1969	October	Fixed-wing	-18.9352	34.5423	1	1	Elephant	2
1085	1969	October	Fixed-wing	-18.8931	34.5168	1	1	Elephant	54
1086	1969	October	Fixed-wing	-18.8821	34.5408	1	1	Elephant	18
1087	1969	October	Fixed-wing	-18.9021	34.5413	1	1	Elephant	127
1088	1969	October	Fixed-wing	-18.9247	34.5538	1	1	Elephant	3
1089	1969	October	Fixed-wing	-18.9337	34.5568	1	1	Elephant	18
1090	1969	October	Fixed-wing	-18.9262	34.4947	1	1	Elephant	3
1091	1969	October	Fixed-wing	-18.9187	34.5097	1	1	Elephant	4
1092	1969	October	Fixed-wing	-18.9252	34.5223	1	1	Elephant	1
1093	1969	October	Fixed-wing	-18.9257	34.5308	1	1	Elephant	2
1094	1972	October	Fixed-wing	-18.3875	34.5809	1	0	Elephant	3
1095	1972	October	Fixed-wing	-18.4186	34.5132	1	0	Elephant	3
1096	1972	October	Fixed-wing	-18.5219	34.4899	1	0	Elephant	219
1097	1972	October	Fixed-wing	-18.5118	34.5461	1	0	Elephant	360
1098	1972	October	Fixed-wing	-18.5114	34.6298	1	0	Elephant	8
1099	1972	October	Fixed-wing	-18.4935	34.6407	1	0	Elephant	125
1100	1972	October	Fixed-wing	-18.5013	34.6613	1	0	Elephant	25
1101	1972	October	Fixed-wing	-18.5676	34.505	1	0	Elephant	176
1102	1972	October	Fixed-wing	-18.5918	34.6161	1	0	Elephant	12
1103	1972	October	Fixed-wing	-18.6114	34.4831	1	0	Elephant	4
1104	1972	October	Fixed-wing	-18.6311	34.5845	1	0	Elephant	239
1105	1972	October	Fixed-wing	-18.5753	34.3569	1	0	Elephant	91
1106	1972	October	Fixed-wing	-18.674	34.3131	1	0	Elephant	15
1107	1972	October	Fixed-wing	-18.712	34.2532	1	0	Elephant	6
1108	1972	October	Fixed-wing	-18.7261	34.2427	1	0	Elephant	8
1109	1972	October	Fixed-wing	-18.7371	34.2674	1	0	Elephant	18
1110	1972	October	Fixed-wing	-18.7718	34.1686	1	0	Elephant	20
1111	1972	October	Fixed-wing	-18.7874	34.1801	1	0	Elephant	58
1112	1972	October	Fixed-wing	-18.7929	34.2495	1	0	Elephant	6
1113	1972	October	Fixed-wing	-18.6544	34.3972	1	1	Elephant	1
1114	1972	October	Fixed-wing	-18.691	34.4209	1	1	Elephant	9
1115	1972	October	Fixed-wing	-18.6846	34.4392	1	1	Elephant	12
1116	1972	October	Fixed-wing	-18.6731	34.5557	1	1	Elephant	9
1117	1972	October	Fixed-wing	-18.6932	34.6001	1	1	Elephant	27
1118	1972	October	Fixed-wing	-18.6937	34.3345	1	1	Elephant	2
1119	1972	October	Fixed-wing	-18.7079	34.3642	1	1	Elephant	47
1120	1972	October	Fixed-wing	-18.7467	34.3359	1	1	Elephant	28
1121	1972	October	Fixed-wing	-18.7814	34.3409	1	1	Elephant	28
1122	1972	October	Fixed-wing	-18.7901	34.2811	1	1	Elephant	26
1123	1972	October	Fixed-wing	-18.7979	34.3108	1	1	Elephant	10
1124	1972	October	Fixed-wing	-18.8335	34.287	1	1	Elephant	11
1125	1972	October	Fixed-wing	-18.8504	34.245	1	1	Elephant	5
1126	1972	October	Fixed-wing	-18.7399	34.4383	1	1	Elephant	3
1127	1972	October	Fixed-wing	-18.7814	34.5014	1	1	Elephant	70
1128	1972	October	Fixed-wing	-18.7874	34.5612	1	1	Elephant	8
1129	1972	October	Fixed-wing	-18.8934	34.2591	1	1	Elephant	221
1130	1972	October	Fixed-wing	-18.9295	34.2541	1	1	Elephant	10
1131	1972	October	Fixed-wing	-18.9236	34.2952	1	1	Elephant	14
1132	1972	October	Fixed-wing	-18.9935	34.2473	1	1	Elephant	15
1133	1972	October	Fixed-wing	-18.9917	34.2971	1	1	Elephant	1
1134	1972	October	Fixed-wing	-18.9779	34.3163	1	1	Elephant	27
1135	1972	October	Fixed-wing	-18.9492	34.3245	1	1	Elephant	2
1136	1972	October	Fixed-wing	-18.9245	34.3295	1	1	Elephant	23
1137	1972	October	Fixed-wing	-18.8591	34.3638	1	1	Elephant	5
1138	1972	October	Fixed-wing	-18.8249	34.4762	1	1	Elephant	8
1139	1972	October	Fixed-wing	-18.8422	34.4561	1	1	Elephant	4
1140	1972	October	Fixed-wing	-18.8569	34.4794	1	1	Elephant	8
1141	1972	October	Fixed-wing	-18.8569	34.436	1	1	Elephant	2
1142	1972	October	Fixed-wing	-18.9021	34.4205	1	1	Elephant	20
1143	1972	October	Fixed-wing	-18.908	34.4013	1	1	Elephant	3
1144	1972	October	Fixed-wing	-18.8774	34.5151	1	1	Elephant	37
1145	1972	October	Fixed-wing	-18.8948	34.4694	1	1	Elephant	4
1146	1972	October	Fixed-wing	-18.9199	34.4579	1	1	Elephant	9
1147	1972	October	Fixed-wing	-18.9496	34.3981	1	1	Elephant	24
1148	1972	October	Fixed-wing	-18.9409	34.4602	1	1	Elephant	29
1149	1972	October	Fixed-wing	-18.9547	34.4534	1	1	Elephant	2
1150	1972	October	Fixed-wing	-19.0031	34.388	1	1	Elephant	2
1151	1972	October	Fixed-wing	-19.0118	34.4136	1	1	Elephant	10
1152	1972	October	Fixed-wing	-18.9958	34.4241	1	1	Elephant	98
1153	1972	October	Fixed-wing	-18.9798	34.4657	1	1	Elephant	3
1154	1972	October	Fixed-wing	-18.9588	34.4899	1	1	Elephant	22
1155	1972	October	Fixed-wing	-18.9396	34.5247	1	1	Elephant	18
1156	1972	October	Fixed-wing	-18.9185	34.5297	1	1	Elephant	20
1157	1972	October	Fixed-wing	-18.9811	34.5306	1	1	Elephant	42
1158	1972	October	Fixed-wing	-18.9524	34.5562	1	1	Elephant	8
1159	1972	October	Fixed-wing	-18.9446	34.579	1	1	Elephant	6
1160	1972	October	Fixed-wing	-19.0259	34.4936	1	1	Elephant	40
1161	1972	October	Fixed-wing	-19.0008	34.5374	1	1	Elephant	11
1162	1972	October	Fixed-wing	-18.9953	34.569	1	1	Elephant	4
1163	1972	October	Fixed-wing	-19.0899	34.5032	1	1	Elephant	2
1164	1972	October	Fixed-wing	-19.0716	34.5374	1	1	Elephant	30
1165	1972	October	Fixed-wing	-19.0511	34.5429	1	1	Elephant	39
1166	1972	October	Fixed-wing	-19.0392	34.5608	1	1	Elephant	9
1167	1972	October	Fixed-wing	-19.063	34.5681	1	1	Elephant	3
1168	1972	October	Fixed-wing	-19.1548	34.5598	1	1	Elephant	4
1169	1972	October	Fixed-wing	-19.1484	34.5758	1	1	Elephant	11
1170	1969	October	Fixed-wing	-18.2729	34.612	1	0	Hartebeest	6
1171	1969	October	Fixed-wing	-18.2641	34.6235	1	0	Hartebeest	8
1172	1969	October	Fixed-wing	-18.3173	34.715	1	0	Hartebeest	6
1173	1969	October	Fixed-wing	-18.3173	34.7683	1	0	Hartebeest	3
1174	1969	October	Fixed-wing	-18.3395	34.6138	1	0	Hartebeest	5
1175	1969	October	Fixed-wing	-18.3697	34.6475	1	0	Hartebeest	13
1176	1969	October	Fixed-wing	-18.3946	34.6875	1	0	Hartebeest	32
1177	1969	October	Fixed-wing	-18.4008	34.7026	1	0	Hartebeest	16
1178	1969	October	Fixed-wing	-18.4159	34.6919	1	0	Hartebeest	12
1179	1969	October	Fixed-wing	-18.4124	34.7052	1	0	Hartebeest	5
1180	1969	October	Fixed-wing	-18.4381	34.4583	1	0	Hartebeest	8
1181	1969	October	Fixed-wing	-18.4355	34.4681	1	0	Hartebeest	7
1182	1969	October	Fixed-wing	-18.4284	34.4761	1	0	Hartebeest	13
1183	1969	October	Fixed-wing	-18.4177	34.4752	1	0	Hartebeest	10
1184	1969	October	Fixed-wing	-18.4372	34.4788	1	0	Hartebeest	6
1185	1969	October	Fixed-wing	-18.4488	34.5081	1	0	Hartebeest	5
1186	1969	October	Fixed-wing	-18.4284	34.5401	1	0	Hartebeest	9
1187	1969	October	Fixed-wing	-18.4372	34.5365	1	0	Hartebeest	12
1188	1969	October	Fixed-wing	-18.4381	34.5489	1	0	Hartebeest	7
1189	1969	October	Fixed-wing	-18.4585	34.5401	1	0	Hartebeest	1
1190	1969	October	Fixed-wing	-18.447	34.4885	1	0	Hartebeest	14
1191	1969	October	Fixed-wing	-18.3839	34.572	1	0	Hartebeest	9
1192	1969	October	Fixed-wing	-18.4159	34.6138	1	0	Hartebeest	8
1193	1969	October	Fixed-wing	-18.4497	34.5916	1	0	Hartebeest	3
1194	1969	October	Fixed-wing	-18.4443	34.6005	1	0	Hartebeest	4
1195	1969	October	Fixed-wing	-18.4532	34.6049	1	0	Hartebeest	15
1196	1969	October	Fixed-wing	-18.4683	34.6022	1	0	Hartebeest	11
1197	1969	October	Fixed-wing	-18.4639	34.6298	1	0	Hartebeest	1
1198	1969	October	Fixed-wing	-18.4745	34.6448	1	0	Hartebeest	10
1199	1969	October	Fixed-wing	-18.463	34.6626	1	0	Hartebeest	2
1200	1969	October	Fixed-wing	-18.5038	34.5942	1	0	Hartebeest	3
1201	1969	October	Fixed-wing	-18.4967	34.6058	1	0	Hartebeest	7
1202	1969	October	Fixed-wing	-18.5154	34.6138	1	0	Hartebeest	3
1203	1969	October	Fixed-wing	-18.5261	34.5489	1	0	Hartebeest	2
1204	1969	October	Fixed-wing	-18.5261	34.5729	1	0	Hartebeest	3
1205	1969	October	Fixed-wing	-18.5385	34.5765	1	0	Hartebeest	3
1206	1969	October	Fixed-wing	-18.5429	34.6271	1	0	Hartebeest	3
1207	1969	October	Fixed-wing	-18.5687	34.6049	1	0	Hartebeest	2
1208	1969	October	Fixed-wing	-18.5172	34.4663	1	0	Hartebeest	6
1209	1969	October	Fixed-wing	-18.5713	34.4806	1	0	Hartebeest	2
1210	1969	October	Fixed-wing	-18.582	34.4459	1	0	Hartebeest	6
1211	1969	October	Fixed-wing	-18.574	34.4139	1	0	Hartebeest	7
1212	1969	October	Fixed-wing	-18.5625	34.3855	1	0	Hartebeest	2
1213	1969	October	Fixed-wing	-18.5651	34.5498	1	0	Hartebeest	2
1214	1969	October	Fixed-wing	-18.5856	34.5258	1	0	Hartebeest	5
1215	1969	October	Fixed-wing	-18.5944	34.5152	1	0	Hartebeest	4
1216	1969	October	Fixed-wing	-18.6415	34.6005	1	0	Hartebeest	10
1217	1969	October	Fixed-wing	-18.7756	34.2798	1	0	Hartebeest	2
1218	1969	October	Fixed-wing	-18.6202	34.3447	1	0	Hartebeest	6
1219	1969	October	Fixed-wing	-18.6087	34.3855	1	1	Hartebeest	22
1220	1969	October	Fixed-wing	-18.6362	34.4193	1	1	Hartebeest	2
1221	1969	October	Fixed-wing	-18.6397	34.4415	1	1	Hartebeest	3
1222	1969	October	Fixed-wing	-18.6682	34.3909	1	1	Hartebeest	4
1223	1969	October	Fixed-wing	-18.6921	34.3429	1	1	Hartebeest	2
1224	1969	October	Fixed-wing	-18.7801	34.2878	1	1	Hartebeest	8
1225	1969	October	Fixed-wing	-18.8049	34.3011	1	1	Hartebeest	2
1226	1969	October	Fixed-wing	-18.7632	34.3544	1	1	Hartebeest	7
1227	1969	October	Fixed-wing	-18.7543	34.4024	1	1	Hartebeest	2
1228	1969	October	Fixed-wing	-18.7694	34.3953	1	1	Hartebeest	1
1229	1969	October	Fixed-wing	-18.7872	34.4237	1	1	Hartebeest	1
1230	1969	October	Fixed-wing	-18.7845	34.4459	1	1	Hartebeest	8
1231	1969	October	Fixed-wing	-18.836	34.3651	1	1	Hartebeest	2
1232	1969	October	Fixed-wing	-18.8715	34.3296	1	1	Hartebeest	8
1233	1969	October	Fixed-wing	-18.9026	34.2931	1	1	Hartebeest	5
1234	1969	October	Fixed-wing	-18.9026	34.342	1	1	Hartebeest	2
1235	1969	October	Fixed-wing	-18.9115	34.342	1	1	Hartebeest	2
1236	1969	October	Fixed-wing	-19.0634	34.2612	1	1	Hartebeest	1
1237	1969	October	Fixed-wing	-18.9817	34.3882	1	1	Hartebeest	8
1238	1969	October	Fixed-wing	-19.0141	34.4127	1	1	Hartebeest	6
1239	1969	October	Fixed-wing	-19.0389	34.4056	1	1	Hartebeest	12
1240	1969	October	Fixed-wing	-19.0596	34.4624	1	1	Hartebeest	4
1241	1969	October	Fixed-wing	-19.0475	34.4759	1	1	Hartebeest	5
1242	1969	October	Fixed-wing	-19.0034	34.5186	1	1	Hartebeest	11
1243	1969	October	Fixed-wing	-18.9842	34.5591	1	1	Hartebeest	5
1244	1972	October	Fixed-wing	-18.4054	34.4601	1	0	Hartebeest	10
1245	1972	October	Fixed-wing	-18.4675	34.4102	1	0	Hartebeest	5
1246	1972	October	Fixed-wing	-18.4675	34.5034	1	0	Hartebeest	37
1247	1972	October	Fixed-wing	-18.4631	34.5367	1	0	Hartebeest	6
1248	1972	October	Fixed-wing	-18.4798	34.5922	1	0	Hartebeest	5
1249	1972	October	Fixed-wing	-18.5053	34.5611	1	0	Hartebeest	30
1250	1972	October	Fixed-wing	-18.5075	34.61	1	0	Hartebeest	72
1251	1972	October	Fixed-wing	-18.5264	34.489	1	0	Hartebeest	30
1252	1972	October	Fixed-wing	-18.5342	34.5045	1	0	Hartebeest	11
1253	1972	October	Fixed-wing	-18.5297	34.5367	1	0	Hartebeest	20
1254	1972	October	Fixed-wing	-18.5686	34.6344	1	0	Hartebeest	10
1255	1972	October	Fixed-wing	-18.7196	34.247	1	0	Hartebeest	7
1256	1972	October	Fixed-wing	-18.7395	34.2825	1	0	Hartebeest	10
1257	1972	October	Fixed-wing	-18.7173	34.3724	1	1	Hartebeest	17
1258	1972	October	Fixed-wing	-18.8472	34.338	1	1	Hartebeest	2
1259	1972	October	Fixed-wing	-18.885	34.3058	1	1	Hartebeest	21
1260	1972	October	Fixed-wing	-18.8916	34.3458	1	1	Hartebeest	3
1261	1972	October	Fixed-wing	-18.8739	34.3857	1	1	Hartebeest	4
1262	1972	October	Fixed-wing	-18.9194	34.3136	1	1	Hartebeest	10
1263	1972	October	Fixed-wing	-18.9283	34.3325	1	1	Hartebeest	21
1264	1972	October	Fixed-wing	-19.0126	34.2758	1	1	Hartebeest	13
1265	1972	October	Fixed-wing	-19.0437	34.257	1	1	Hartebeest	5
1266	1969	October	Fixed-wing	-18.2891	34.7946	1	0	Sable	24
1267	1969	October	Fixed-wing	-18.3233	34.7744	1	0	Sable	30
1268	1969	October	Fixed-wing	-18.2666	34.3415	1	0	Sable	9
1269	1969	October	Fixed-wing	-18.3754	34.4363	1	0	Sable	12
1270	1969	October	Fixed-wing	-18.38	34.4744	1	0	Sable	7
1271	1969	October	Fixed-wing	-18.3723	34.5172	1	0	Sable	20
1272	1969	October	Fixed-wing	-18.3046	34.5692	1	0	Sable	12
1273	1969	October	Fixed-wing	-18.2821	34.6268	1	0	Sable	30
1274	1969	October	Fixed-wing	-18.3412	34.6205	1	0	Sable	12
1275	1969	October	Fixed-wing	-18.3536	34.6229	1	0	Sable	31
1276	1969	October	Fixed-wing	-18.3412	34.7107	1	0	Sable	30
1277	1969	October	Fixed-wing	-18.3536	34.7029	1	0	Sable	15
1278	1969	October	Fixed-wing	-18.3715	34.6812	1	0	Sable	8
1279	1969	October	Fixed-wing	-18.3956	34.6951	1	0	Sable	30
1280	1969	October	Fixed-wing	-18.415	34.6858	1	0	Sable	20
1281	1969	October	Fixed-wing	-18.4166	34.6998	1	0	Sable	35
1282	1969	October	Fixed-wing	-18.4368	34.5141	1	0	Sable	25
1283	1969	October	Fixed-wing	-18.45	34.5382	1	0	Sable	12
1284	1969	October	Fixed-wing	-18.4531	34.549	1	0	Sable	14
1285	1969	October	Fixed-wing	-18.4476	34.5646	1	0	Sable	18
1286	1969	October	Fixed-wing	-18.4329	34.6112	1	0	Sable	2
1287	1969	October	Fixed-wing	-18.4624	34.6656	1	0	Sable	11
1288	1969	October	Fixed-wing	-18.4725	34.6819	1	0	Sable	30
1289	1969	October	Fixed-wing	-18.4974	34.6757	1	0	Sable	14
1290	1969	October	Fixed-wing	-18.5386	34.6703	1	0	Sable	9
1291	1969	October	Fixed-wing	-18.5852	34.6011	1	0	Sable	12
1292	1969	October	Fixed-wing	-18.6	34.5809	1	0	Sable	8
1293	1969	October	Fixed-wing	-18.6116	34.6104	1	0	Sable	2
1294	1969	October	Fixed-wing	-18.6474	34.5871	1	0	Sable	11
1295	1969	October	Fixed-wing	-18.5223	34.448	1	0	Sable	9
1296	1969	October	Fixed-wing	-18.5565	34.4705	1	0	Sable	1
1297	1969	October	Fixed-wing	-18.5883	34.5024	1	0	Sable	11
1298	1969	October	Fixed-wing	-18.6824	34.3151	1	0	Sable	1
1299	1969	October	Fixed-wing	-19.0282	34.2078	1	0	Sable	10
1300	1969	October	Fixed-wing	-18.6192	34.3165	1	0	Sable	18
1301	1969	October	Fixed-wing	-18.6353	34.3656	1	1	Sable	17
1302	1969	October	Fixed-wing	-18.7759	34.416	1	1	Sable	3
1303	1969	October	Fixed-wing	-18.8536	34.3892	1	1	Sable	24
1304	1969	October	Fixed-wing	-18.9158	34.342	1	1	Sable	1
1305	1969	October	Fixed-wing	-18.8418	34.4676	1	1	Sable	25
1306	1969	October	Fixed-wing	-18.9661	34.4657	1	1	Sable	7
1307	1969	October	Fixed-wing	-19.0016	34.4831	1	1	Sable	1
1308	1969	October	Fixed-wing	-19.0414	34.5335	1	1	Sable	3
1309	1969	October	Fixed-wing	-18.128	34.1722	1	0	Sable	2
1310	1969	October	Fixed-wing	-18.1566	34.1853	1	0	Sable	2
1311	1972	October	Fixed-wing	-18.2744	34.6899	1	0	Sable	4
1312	1972	October	Fixed-wing	-18.2955	34.761	1	0	Sable	20
1313	1972	October	Fixed-wing	-18.492	34.3946	1	0	Sable	1
1314	1972	October	Fixed-wing	-18.4576	34.4335	1	0	Sable	30
1315	1972	October	Fixed-wing	-18.4409	34.4812	1	0	Sable	70
1316	1972	October	Fixed-wing	-18.4786	34.5245	1	0	Sable	83
1317	1972	October	Fixed-wing	-18.4775	34.5478	1	0	Sable	15
1318	1972	October	Fixed-wing	-18.5342	34.6222	1	0	Sable	15
1319	1972	October	Fixed-wing	-18.5686	34.6178	1	0	Sable	10
1320	1972	October	Fixed-wing	-18.5564	34.5167	1	0	Sable	30
1321	1972	October	Fixed-wing	-18.5719	34.3569	1	0	Sable	6
1322	1972	October	Fixed-wing	-18.6219	34.5389	1	0	Sable	15
1323	1972	October	Fixed-wing	-18.6219	34.5623	1	0	Sable	28
1324	1972	October	Fixed-wing	-18.7751	34.1859	1	0	Sable	3
1325	1972	October	Fixed-wing	-18.7118	34.2903	1	0	Sable	20
1326	1972	October	Fixed-wing	-18.6085	34.3824	1	1	Sable	7
1327	1972	October	Fixed-wing	-18.6829	34.4357	1	1	Sable	1
1328	1972	October	Fixed-wing	-18.7307	34.5945	1	1	Sable	3
1329	1972	October	Fixed-wing	-18.7429	34.3069	1	1	Sable	8
1330	1972	October	Fixed-wing	-18.7695	34.4079	1	1	Sable	30
1331	1972	October	Fixed-wing	-18.8006	34.3769	1	1	Sable	23
1332	1972	October	Fixed-wing	-18.8195	34.2681	1	1	Sable	11
1333	1972	October	Fixed-wing	-18.8872	34.3846	1	1	Sable	1
1334	1972	October	Fixed-wing	-18.9083	34.3469	1	1	Sable	1
1335	1972	October	Fixed-wing	-18.9327	34.3091	1	1	Sable	6
1336	1972	October	Fixed-wing	-19.0326	34.2403	1	1	Sable	5
1337	1972	October	Fixed-wing	-19.0393	34.5467	1	1	Sable	8
1338	1972	October	Fixed-wing	-19.0748	34.5267	1	1	Sable	7
1339	1972	October	Fixed-wing	-18.5597	34.4557	1	0	Sable	25
1340	1969	October	Fixed-wing	-18.2608	34.6254	1	0	Waterbuck	2
1341	1969	October	Fixed-wing	-18.3045	34.7744	1	0	Waterbuck	9
1342	1969	October	Fixed-wing	-18.3139	34.7899	1	0	Waterbuck	30
1343	1969	October	Fixed-wing	-18.4534	34.4933	1	0	Waterbuck	14
1344	1969	October	Fixed-wing	-18.4703	34.5408	1	0	Waterbuck	12
1345	1969	October	Fixed-wing	-18.4775	34.5556	1	0	Waterbuck	9
1346	1969	October	Fixed-wing	-18.4606	34.5894	1	0	Waterbuck	6
1347	1969	October	Fixed-wing	-18.4864	34.5995	1	0	Waterbuck	8
1348	1969	October	Fixed-wing	-18.4759	34.6112	1	0	Waterbuck	15
1349	1969	October	Fixed-wing	-18.5109	34.6365	1	0	Waterbuck	20
1350	1969	October	Fixed-wing	-18.5491	34.6216	1	0	Waterbuck	20
1351	1969	October	Fixed-wing	-18.5459	34.6349	1	0	Waterbuck	12
1352	1969	October	Fixed-wing	-18.5475	34.6466	1	0	Waterbuck	20
1353	1969	October	Fixed-wing	-18.5596	34.6349	1	0	Waterbuck	8
1354	1969	October	Fixed-wing	-18.5608	34.6458	1	0	Waterbuck	16
1355	1969	October	Fixed-wing	-18.56	34.5231	1	0	Waterbuck	2
1356	1969	October	Fixed-wing	-18.5978	34.5894	1	0	Waterbuck	4
1357	1969	October	Fixed-wing	-18.6155	34.6043	1	0	Waterbuck	9
1358	1969	October	Fixed-wing	-18.636	34.6047	1	0	Waterbuck	8
1359	1969	October	Fixed-wing	-18.661	34.6357	1	0	Waterbuck	20
1360	1969	October	Fixed-wing	-18.6722	34.6381	1	0	Waterbuck	12
1361	1969	October	Fixed-wing	-18.6811	34.6212	1	0	Waterbuck	7
1362	1969	October	Fixed-wing	-18.6103	34.3601	1	0	Waterbuck	3
1363	1969	October	Fixed-wing	-18.6336	34.3778	1	1	Waterbuck	27
1364	1969	October	Fixed-wing	-18.7197	34.5617	1	1	Waterbuck	4
1365	1969	October	Fixed-wing	-18.7599	34.5822	1	1	Waterbuck	60
1366	1969	October	Fixed-wing	-18.768	34.5894	1	1	Waterbuck	45
1367	1969	October	Fixed-wing	-18.7648	34.5536	1	1	Waterbuck	40
1368	1969	October	Fixed-wing	-18.7628	34.5645	1	1	Waterbuck	26
1369	1969	October	Fixed-wing	-18.7765	34.5609	1	1	Waterbuck	26
1370	1969	October	Fixed-wing	-18.7463	34.4848	1	1	Waterbuck	12
1371	1969	October	Fixed-wing	-18.7499	34.4937	1	1	Waterbuck	12
1372	1969	October	Fixed-wing	-18.7499	34.505	1	1	Waterbuck	15
1373	1969	October	Fixed-wing	-18.7531	34.4816	1	1	Waterbuck	25
1374	1969	October	Fixed-wing	-18.7628	34.4756	1	1	Waterbuck	50
1375	1969	October	Fixed-wing	-18.7628	34.4866	1	1	Waterbuck	6
1376	1969	October	Fixed-wing	-18.7599	34.4959	1	1	Waterbuck	20
1377	1969	October	Fixed-wing	-18.7718	34.4821	1	1	Waterbuck	15
1378	1969	October	Fixed-wing	-18.7696	34.4933	1	1	Waterbuck	12
1379	1969	October	Fixed-wing	-18.7651	34.5303	1	1	Waterbuck	1
1380	1969	October	Fixed-wing	-18.7721	34.5165	1	1	Waterbuck	8
1381	1969	October	Fixed-wing	-18.7818	34.5184	1	1	Waterbuck	5
1382	1969	October	Fixed-wing	-18.7792	34.5274	1	1	Waterbuck	80
1383	1969	October	Fixed-wing	-18.7767	34.541	1	1	Waterbuck	32
1384	1969	October	Fixed-wing	-18.7841	34.5371	1	1	Waterbuck	22
1385	1969	October	Fixed-wing	-18.7918	34.5326	1	1	Waterbuck	34
1386	1969	October	Fixed-wing	-18.796	34.5419	1	1	Waterbuck	6
1387	1969	October	Fixed-wing	-18.7924	34.5522	1	1	Waterbuck	7
1388	1969	October	Fixed-wing	-18.8043	34.5474	1	1	Waterbuck	15
1389	1969	October	Fixed-wing	-18.8027	34.5571	1	1	Waterbuck	1
1390	1969	October	Fixed-wing	-18.7857	34.4351	1	1	Waterbuck	35
1391	1969	October	Fixed-wing	-18.7966	34.4338	1	1	Waterbuck	12
1392	1969	October	Fixed-wing	-18.8017	34.4447	1	1	Waterbuck	35
1393	1969	October	Fixed-wing	-18.8104	34.4473	1	1	Waterbuck	60
1394	1969	October	Fixed-wing	-18.7779	34.4669	1	1	Waterbuck	23
1395	1969	October	Fixed-wing	-18.7808	34.4566	1	1	Waterbuck	11
1396	1969	October	Fixed-wing	-18.7915	34.4537	1	1	Waterbuck	3
1397	1969	October	Fixed-wing	-18.7911	34.4798	1	1	Waterbuck	14
1398	1969	October	Fixed-wing	-18.7792	34.4991	1	1	Waterbuck	40
1399	1969	October	Fixed-wing	-18.7808	34.5075	1	1	Waterbuck	70
1400	1969	October	Fixed-wing	-18.7886	34.4978	1	1	Waterbuck	8
1401	1969	October	Fixed-wing	-18.7931	34.5065	1	1	Waterbuck	30
1402	1969	October	Fixed-wing	-18.804	34.4592	1	1	Waterbuck	40
1403	1969	October	Fixed-wing	-18.8056	34.4708	1	1	Waterbuck	6
1404	1969	October	Fixed-wing	-18.8143	34.4772	1	1	Waterbuck	40
1405	1969	October	Fixed-wing	-18.7969	34.4898	1	1	Waterbuck	20
1406	1969	October	Fixed-wing	-18.8075	34.485	1	1	Waterbuck	11
1407	1969	October	Fixed-wing	-18.8075	34.4972	1	1	Waterbuck	60
1408	1969	October	Fixed-wing	-18.803	34.5052	1	1	Waterbuck	20
1409	1969	October	Fixed-wing	-18.8175	34.4592	1	1	Waterbuck	15
1410	1969	October	Fixed-wing	-18.8211	34.4708	1	1	Waterbuck	56
1411	1969	October	Fixed-wing	-18.8294	34.4792	1	1	Waterbuck	18
1412	1969	October	Fixed-wing	-18.8253	34.5107	1	1	Waterbuck	17
1413	1969	October	Fixed-wing	-18.8349	34.4978	1	1	Waterbuck	3
1414	1969	October	Fixed-wing	-18.8343	34.5194	1	1	Waterbuck	10
1415	1969	October	Fixed-wing	-18.8436	34.5207	1	1	Waterbuck	6
1416	1969	October	Fixed-wing	-18.8417	34.532	1	1	Waterbuck	3
1417	1969	October	Fixed-wing	-18.86	34.531	1	1	Waterbuck	10
1418	1969	October	Fixed-wing	-18.871	34.5281	1	1	Waterbuck	24
1419	1969	October	Fixed-wing	-18.8362	34.4605	1	1	Waterbuck	28
1420	1969	October	Fixed-wing	-18.8436	34.4689	1	1	Waterbuck	20
1421	1969	October	Fixed-wing	-18.8542	34.464	1	1	Waterbuck	40
1422	1969	October	Fixed-wing	-18.8429	34.4792	1	1	Waterbuck	12
1423	1969	October	Fixed-wing	-18.8429	34.4888	1	1	Waterbuck	18
1424	1969	October	Fixed-wing	-18.8439	34.4985	1	1	Waterbuck	10
1425	1969	October	Fixed-wing	-18.8462	34.5091	1	1	Waterbuck	15
1426	1969	October	Fixed-wing	-18.851	34.483	1	1	Waterbuck	14
1427	1969	October	Fixed-wing	-18.8504	34.4927	1	1	Waterbuck	6
1428	1969	October	Fixed-wing	-18.8536	34.5017	1	1	Waterbuck	90
1429	1969	October	Fixed-wing	-18.8568	34.5133	1	1	Waterbuck	45
1430	1969	October	Fixed-wing	-18.88	34.5233	1	1	Waterbuck	80
1431	1969	October	Fixed-wing	-18.8909	34.5159	1	1	Waterbuck	10
1432	1969	October	Fixed-wing	-18.8787	34.513	1	1	Waterbuck	30
1433	1969	October	Fixed-wing	-18.8832	34.5046	1	1	Waterbuck	60
1434	1969	October	Fixed-wing	-18.8935	34.5303	1	1	Waterbuck	25
1435	1969	October	Fixed-wing	-18.8954	34.541	1	1	Waterbuck	25
1436	1969	October	Fixed-wing	-18.9006	34.5249	1	1	Waterbuck	18
1437	1969	October	Fixed-wing	-18.9035	34.5374	1	1	Waterbuck	6
1438	1969	October	Fixed-wing	-18.8636	34.4859	1	1	Waterbuck	20
1439	1969	October	Fixed-wing	-18.8671	34.4962	1	1	Waterbuck	16
1440	1969	October	Fixed-wing	-18.8619	34.5056	1	1	Waterbuck	14
1441	1969	October	Fixed-wing	-18.8716	34.5097	1	1	Waterbuck	30
1442	1969	October	Fixed-wing	-18.8449	34.3826	1	1	Waterbuck	13
1443	1969	October	Fixed-wing	-18.8549	34.38	1	1	Waterbuck	6
1444	1969	October	Fixed-wing	-18.8513	34.3919	1	1	Waterbuck	20
1445	1969	October	Fixed-wing	-18.8449	34.3984	1	1	Waterbuck	4
1446	1969	October	Fixed-wing	-18.8452	34.4083	1	1	Waterbuck	23
1447	1969	October	Fixed-wing	-18.8475	34.4212	1	1	Waterbuck	80
1448	1969	October	Fixed-wing	-18.8494	34.4367	1	1	Waterbuck	30
1449	1969	October	Fixed-wing	-18.85	34.4502	1	1	Waterbuck	25
1450	1969	October	Fixed-wing	-18.8632	34.446	1	1	Waterbuck	5
1451	1969	October	Fixed-wing	-18.8616	34.4544	1	1	Waterbuck	15
1452	1969	October	Fixed-wing	-18.8552	34.4026	1	1	Waterbuck	170
1453	1969	October	Fixed-wing	-18.8565	34.4129	1	1	Waterbuck	8
1454	1969	October	Fixed-wing	-18.8626	34.391	1	1	Waterbuck	22
1455	1969	October	Fixed-wing	-18.8703	34.3874	1	1	Waterbuck	16
1456	1969	October	Fixed-wing	-18.8703	34.398	1	1	Waterbuck	13
1457	1969	October	Fixed-wing	-18.8748	34.3762	1	1	Waterbuck	2
1458	1969	October	Fixed-wing	-18.8822	34.3845	1	1	Waterbuck	50
1459	1969	October	Fixed-wing	-18.879	34.3923	1	1	Waterbuck	20
1460	1969	October	Fixed-wing	-18.869	34.4158	1	1	Waterbuck	20
1461	1969	October	Fixed-wing	-18.8729	34.426	1	1	Waterbuck	7
1462	1969	October	Fixed-wing	-18.8697	34.2973	1	1	Waterbuck	3
1463	1969	October	Fixed-wing	-18.8922	34.3005	1	1	Waterbuck	4
1464	1969	October	Fixed-wing	-18.9163	34.3231	1	1	Waterbuck	2
1465	1969	October	Fixed-wing	-18.9302	34.3459	1	1	Waterbuck	1
1466	1969	October	Fixed-wing	-18.9328	34.3559	1	1	Waterbuck	5
1467	1969	October	Fixed-wing	-18.8787	34.3411	1	1	Waterbuck	2
1468	1969	October	Fixed-wing	-18.8835	34.3617	1	1	Waterbuck	2
1469	1969	October	Fixed-wing	-18.9009	34.3511	1	1	Waterbuck	2
1470	1969	October	Fixed-wing	-18.9044	34.3977	1	1	Waterbuck	18
1471	1969	October	Fixed-wing	-18.8996	34.4061	1	1	Waterbuck	7
1472	1969	October	Fixed-wing	-18.8928	34.4457	1	1	Waterbuck	4
1473	1969	October	Fixed-wing	-18.8825	34.4483	1	1	Waterbuck	14
1474	1969	October	Fixed-wing	-18.8813	34.4579	1	1	Waterbuck	4
1475	1969	October	Fixed-wing	-18.8912	34.4566	1	1	Waterbuck	8
1476	1969	October	Fixed-wing	-18.8906	34.466	1	1	Waterbuck	10
1477	1969	October	Fixed-wing	-18.899	34.464	1	1	Waterbuck	30
1478	1969	October	Fixed-wing	-18.9041	34.4541	1	1	Waterbuck	40
1479	1969	October	Fixed-wing	-18.9086	34.4637	1	1	Waterbuck	9
1480	1969	October	Fixed-wing	-18.9022	34.474	1	1	Waterbuck	20
1481	1969	October	Fixed-wing	-18.899	34.4956	1	1	Waterbuck	3
1482	1969	October	Fixed-wing	-18.9041	34.4882	1	1	Waterbuck	30
1483	1969	October	Fixed-wing	-18.9134	34.4846	1	1	Waterbuck	32
1484	1969	October	Fixed-wing	-18.9353	34.4743	1	1	Waterbuck	7
1485	1969	October	Fixed-wing	-18.9106	34.5149	1	1	Waterbuck	4
1486	1969	October	Fixed-wing	-18.9276	34.5339	1	1	Waterbuck	1
1487	1969	October	Fixed-wing	-18.9698	34.5416	1	1	Waterbuck	6
1488	1969	October	Fixed-wing	-18.9781	34.5712	1	1	Waterbuck	6
1489	1969	October	Fixed-wing	-19.0045	34.5294	1	1	Waterbuck	7
1490	1969	October	Fixed-wing	-18.9839	34.2828	1	1	Waterbuck	15
1491	1969	October	Fixed-wing	-18.9666	34.3408	1	1	Waterbuck	9
1492	1969	October	Fixed-wing	-18.9797	34.3272	1	1	Waterbuck	3
1493	1969	October	Fixed-wing	-18.9826	34.3379	1	1	Waterbuck	24
1494	1969	October	Fixed-wing	-18.9894	34.3491	1	1	Waterbuck	15
1495	1969	October	Fixed-wing	-19.0084	34.4029	1	1	Waterbuck	30
1496	1969	October	Fixed-wing	-19.0345	34.4383	1	1	Waterbuck	9
1497	1969	October	Fixed-wing	-19.0473	34.4447	1	1	Waterbuck	15
1498	1969	October	Fixed-wing	-19.0393	34.4627	1	1	Waterbuck	7
1499	1969	October	Fixed-wing	-19.0406	34.492	1	1	Waterbuck	10
1500	1969	October	Fixed-wing	-19.0316	34.5023	1	1	Waterbuck	12
1501	1969	October	Fixed-wing	-19.0554	34.5686	1	1	Waterbuck	8
1502	1969	October	Fixed-wing	-19.0634	34.5638	1	1	Waterbuck	12
1503	1969	October	Fixed-wing	-19.114	34.5242	1	1	Waterbuck	10
1504	1969	October	Fixed-wing	-19.1259	34.5197	1	1	Waterbuck	10
1505	1969	October	Fixed-wing	-19.1223	34.5316	1	1	Waterbuck	10
1506	1969	October	Fixed-wing	-19.1314	34.5294	1	1	Waterbuck	8
1507	1969	October	Fixed-wing	-19.1204	34.5429	1	1	Waterbuck	80
1508	1969	October	Fixed-wing	-19.1339	34.5397	1	1	Waterbuck	3
1509	1969	October	Fixed-wing	-19.15	34.5323	1	1	Waterbuck	8
1510	1969	October	Fixed-wing	-18.8141	34.5023	1	1	Waterbuck	16
1511	1969	October	Fixed-wing	-18.8113	34.5125	1	1	Waterbuck	90
1512	1969	October	Fixed-wing	-18.8039	34.5199	1	1	Waterbuck	20
1513	1969	October	Fixed-wing	-18.8117	34.5273	1	1	Waterbuck	93
1514	1969	October	Fixed-wing	-18.8155	34.5385	1	1	Waterbuck	6
1515	1972	October	Fixed-wing	-18.6799	34.351	1	1	Waterbuck	3
1516	1972	October	Fixed-wing	-18.7559	34.472	1	1	Waterbuck	20
1517	1972	October	Fixed-wing	-18.7772	34.4946	1	1	Waterbuck	342
1518	1972	October	Fixed-wing	-18.7319	34.6094	1	1	Waterbuck	30
1519	1972	October	Fixed-wing	-18.7416	34.59	1	1	Waterbuck	120
1520	1972	October	Fixed-wing	-18.8119	34.4588	1	1	Waterbuck	5
1521	1972	October	Fixed-wing	-18.8106	34.4873	1	1	Waterbuck	10
1522	1972	October	Fixed-wing	-18.8249	34.5132	1	1	Waterbuck	54
1523	1972	October	Fixed-wing	-18.7998	34.5493	1	1	Waterbuck	125
1524	1972	October	Fixed-wing	-18.8413	34.545	1	1	Waterbuck	100
1525	1972	October	Fixed-wing	-18.8526	34.4809	1	1	Waterbuck	275
1526	1972	October	Fixed-wing	-18.833	34.4704	1	1	Waterbuck	316
1527	1972	October	Fixed-wing	-18.8583	34.4426	1	1	Waterbuck	140
1528	1972	October	Fixed-wing	-18.8704	34.4251	1	1	Waterbuck	57
1529	1972	October	Fixed-wing	-18.872	34.5192	1	1	Waterbuck	270
1530	1972	October	Fixed-wing	-18.8815	34.5485	1	1	Waterbuck	290
1531	1972	October	Fixed-wing	-18.8947	34.5302	1	1	Waterbuck	37
1532	1972	October	Fixed-wing	-18.9146	34.5534	1	1	Waterbuck	10
1533	1972	October	Fixed-wing	-18.8933	34.4712	1	1	Waterbuck	232
1534	1972	October	Fixed-wing	-18.8985	34.4976	1	1	Waterbuck	95
1535	1972	October	Fixed-wing	-18.9173	34.52	1	1	Waterbuck	111
1536	1972	October	Fixed-wing	-18.8998	34.3556	1	1	Waterbuck	7
1537	1972	October	Fixed-wing	-18.9001	34.3887	1	1	Waterbuck	187
1538	1972	October	Fixed-wing	-18.923	34.3518	1	1	Waterbuck	25
1539	1972	October	Fixed-wing	-18.9232	34.2976	1	1	Waterbuck	11
1540	1972	October	Fixed-wing	-18.9852	34.3157	1	1	Waterbuck	80
1541	1972	October	Fixed-wing	-19.0278	34.2268	1	1	Waterbuck	2
1542	1972	October	Fixed-wing	-19.0547	34.2583	1	1	Waterbuck	20
1543	1972	October	Fixed-wing	-19.0076	34.5612	1	1	Waterbuck	15
1544	1972	October	Fixed-wing	-19.0456	34.5439	1	1	Waterbuck	6
1545	1972	October	Fixed-wing	-19.0523	34.566	1	1	Waterbuck	25
1546	1972	October	Fixed-wing	-19.0556	34.4836	1	1	Waterbuck	6
1547	1972	October	Fixed-wing	-19.0674	34.4618	1	1	Waterbuck	9
1548	1972	October	Fixed-wing	-19.096	34.4997	1	1	Waterbuck	9
1549	1972	October	Fixed-wing	-19.1474	34.538	1	1	Waterbuck	50
1550	1972	October	Fixed-wing	-19.1569	34.5512	1	1	Waterbuck	100
1551	1972	October	Fixed-wing	-18.4758	34.5001	1	0	Waterbuck	30
1552	1972	October	Fixed-wing	-18.5042	34.6184	1	0	Waterbuck	40
1553	1972	October	Fixed-wing	-18.5865	34.3494	1	0	Waterbuck	5
1554	1972	October	Fixed-wing	-18.6045	34.368	1	0	Waterbuck	27
1555	1972	October	Fixed-wing	-18.7123	34.2619	1	0	Waterbuck	16
1556	1972	October	Fixed-wing	-18.6514	34.619	1	0	Waterbuck	5
1557	1972	October	Fixed-wing	-18.6723	34.6028	1	0	Waterbuck	35
1558	1972	October	Fixed-wing	-18.6827	34.6155	1	0	Waterbuck	20
1559	1969	October	Fixed-wing	-18.3242	34.5512	1	0	Blue wildebeest	5
1560	1969	October	Fixed-wing	-18.3118	34.5635	1	0	Blue wildebeest	5
1561	1969	October	Fixed-wing	-18.3075	34.6129	1	0	Blue wildebeest	12
1562	1969	October	Fixed-wing	-18.4286	34.4678	1	0	Blue wildebeest	12
1563	1969	October	Fixed-wing	-18.3909	34.5055	1	0	Blue wildebeest	15
1564	1969	October	Fixed-wing	-18.4352	34.499	1	0	Blue wildebeest	12
1565	1969	October	Fixed-wing	-18.3293	34.6339	1	0	Blue wildebeest	12
1566	1969	October	Fixed-wing	-18.3293	34.713	1	0	Blue wildebeest	18
1567	1969	October	Fixed-wing	-18.3822	34.6622	1	0	Blue wildebeest	15
1568	1969	October	Fixed-wing	-18.3829	34.6999	1	0	Blue wildebeest	10
1569	1969	October	Fixed-wing	-18.4054	34.7028	1	0	Blue wildebeest	20
1570	1969	October	Fixed-wing	-18.4054	34.718	1	0	Blue wildebeest	80
1571	1969	October	Fixed-wing	-18.4453	34.5991	1	0	Blue wildebeest	15
1572	1969	October	Fixed-wing	-18.4896	34.5824	1	0	Blue wildebeest	13
1573	1969	October	Fixed-wing	-18.4787	34.6383	1	0	Blue wildebeest	30
1574	1969	October	Fixed-wing	-18.4635	34.6346	1	0	Blue wildebeest	4
1575	1969	October	Fixed-wing	-18.4402	34.6615	1	0	Blue wildebeest	40
1576	1969	October	Fixed-wing	-18.4635	34.6557	1	0	Blue wildebeest	10
1577	1969	October	Fixed-wing	-18.4635	34.668	1	0	Blue wildebeest	12
1578	1969	October	Fixed-wing	-18.4555	34.6825	1	0	Blue wildebeest	4
1579	1969	October	Fixed-wing	-18.5316	34.5476	1	0	Blue wildebeest	33
1580	1969	October	Fixed-wing	-18.5178	34.5976	1	0	Blue wildebeest	20
1581	1969	October	Fixed-wing	-18.5099	34.6071	1	0	Blue wildebeest	2
1582	1969	October	Fixed-wing	-18.4932	34.6579	1	0	Blue wildebeest	60
1583	1969	October	Fixed-wing	-18.5186	34.6216	1	0	Blue wildebeest	20
1584	1969	October	Fixed-wing	-18.5215	34.6375	1	0	Blue wildebeest	40
1585	1969	October	Fixed-wing	-18.5251	34.6542	1	0	Blue wildebeest	30
1586	1969	October	Fixed-wing	-18.5563	34.6528	1	0	Blue wildebeest	2
1587	1969	October	Fixed-wing	-18.5128	34.4323	1	0	Blue wildebeest	3
1588	1969	October	Fixed-wing	-18.5708	34.4047	1	0	Blue wildebeest	3
1589	1969	October	Fixed-wing	-18.5991	34.4533	1	0	Blue wildebeest	16
1590	1969	October	Fixed-wing	-18.6223	34.4968	1	0	Blue wildebeest	20
1591	1969	October	Fixed-wing	-18.6129	34.4975	1	0	Blue wildebeest	40
1592	1969	October	Fixed-wing	-18.594	34.52	1	0	Blue wildebeest	50
1593	1969	October	Fixed-wing	-18.6129	34.5316	1	0	Blue wildebeest	6
1594	1969	October	Fixed-wing	-18.5911	34.5737	1	0	Blue wildebeest	30
1595	1969	October	Fixed-wing	-18.5795	34.5802	1	0	Blue wildebeest	40
1596	1969	October	Fixed-wing	-18.6071	34.5947	1	0	Blue wildebeest	24
1597	1969	October	Fixed-wing	-18.6491	34.586	1	0	Blue wildebeest	8
1598	1969	October	Fixed-wing	-18.647	34.602	1	0	Blue wildebeest	20
1599	1969	October	Fixed-wing	-18.6681	34.5927	1	0	Blue wildebeest	45
1600	1969	October	Fixed-wing	-18.6588	34.6026	1	0	Blue wildebeest	9
1601	1969	October	Fixed-wing	-18.6745	34.6107	1	0	Blue wildebeest	40
1602	1969	October	Fixed-wing	-18.689	34.62	1	0	Blue wildebeest	35
1603	1969	October	Fixed-wing	-18.6565	34.5527	1	0	Blue wildebeest	60
1604	1969	October	Fixed-wing	-18.671	34.5521	1	1	Blue wildebeest	4
1605	1969	October	Fixed-wing	-18.6907	34.5968	1	1	Blue wildebeest	100
1606	1969	October	Fixed-wing	-18.6318	34.3663	1	1	Blue wildebeest	10
1607	1969	October	Fixed-wing	-18.7157	34.4325	1	1	Blue wildebeest	20
1608	1969	October	Fixed-wing	-18.6925	34.5155	1	1	Blue wildebeest	1
1609	1969	October	Fixed-wing	-18.689	34.3385	1	1	Blue wildebeest	140
1610	1969	October	Fixed-wing	-18.7087	34.3415	1	1	Blue wildebeest	100
1611	1969	October	Fixed-wing	-18.7209	34.3333	1	1	Blue wildebeest	45
1612	1969	October	Fixed-wing	-18.8033	34.5202	1	1	Blue wildebeest	1
1613	1969	October	Fixed-wing	-18.8294	34.5144	1	1	Blue wildebeest	12
1614	1969	October	Fixed-wing	-18.8213	34.5527	1	1	Blue wildebeest	15
1615	1969	October	Fixed-wing	-18.8584	34.4459	1	1	Blue wildebeest	1
1616	1969	October	Fixed-wing	-18.8816	34.4297	1	1	Blue wildebeest	7
1617	1969	October	Fixed-wing	-18.9002	34.4285	1	1	Blue wildebeest	1
1618	1969	October	Fixed-wing	-18.8729	34.2416	1	1	Blue wildebeest	15
1619	1969	October	Fixed-wing	-19.0609	34.2474	1	1	Blue wildebeest	4
1620	1969	October	Fixed-wing	-19.0574	34.4285	1	1	Blue wildebeest	15
1621	1969	October	Fixed-wing	-19.0359	34.4712	1	1	Blue wildebeest	40
1622	1969	October	Fixed-wing	-19.0573	34.4749	1	1	Blue wildebeest	20
1623	1969	October	Fixed-wing	-19.0679	34.4624	1	1	Blue wildebeest	25
1624	1969	October	Fixed-wing	-18.8883	34.4647	1	1	Blue wildebeest	2
1625	1969	October	Fixed-wing	-18.8906	34.4791	1	1	Blue wildebeest	1
1626	1969	October	Fixed-wing	-18.8957	34.467	1	1	Blue wildebeest	1
1627	1969	October	Fixed-wing	-18.9022	34.4721	1	1	Blue wildebeest	5
1628	1969	October	Fixed-wing	-18.9004	34.4833	1	1	Blue wildebeest	1
1629	1969	October	Fixed-wing	-18.9096	34.4782	1	1	Blue wildebeest	1
1630	1969	October	Fixed-wing	-19.0475	34.5459	1	1	Blue wildebeest	20
1631	1969	October	Fixed-wing	-19.0763	34.5302	1	1	Blue wildebeest	16
1632	1969	October	Fixed-wing	-19.0856	34.5585	1	1	Blue wildebeest	3
1633	1969	October	Fixed-wing	-19.081	34.499	1	1	Blue wildebeest	3
1634	1969	October	Fixed-wing	-19.0861	34.5102	1	1	Blue wildebeest	24
1635	1969	October	Fixed-wing	-19.0847	34.5209	1	1	Blue wildebeest	10
1636	1969	October	Fixed-wing	-19.0902	34.5264	1	1	Blue wildebeest	50
1637	1969	October	Fixed-wing	-19.0847	34.5325	1	1	Blue wildebeest	12
1638	1969	October	Fixed-wing	-19.087	34.5408	1	1	Blue wildebeest	73
1639	1969	October	Fixed-wing	-19.0963	34.4949	1	1	Blue wildebeest	20
1640	1969	October	Fixed-wing	-19.0944	34.5028	1	1	Blue wildebeest	25
1641	1969	October	Fixed-wing	-19.1056	34.5005	1	1	Blue wildebeest	30
1642	1969	October	Fixed-wing	-19.1023	34.5083	1	1	Blue wildebeest	60
1643	1969	October	Fixed-wing	-19.0958	34.5134	1	1	Blue wildebeest	60
1644	1969	October	Fixed-wing	-19.1134	34.5083	1	1	Blue wildebeest	40
1645	1969	October	Fixed-wing	-19.106	34.5181	1	1	Blue wildebeest	100
1646	1969	October	Fixed-wing	-19.1139	34.5209	1	1	Blue wildebeest	75
1647	1969	October	Fixed-wing	-19.1014	34.5325	1	1	Blue wildebeest	79
1648	1969	October	Fixed-wing	-19.0972	34.5418	1	1	Blue wildebeest	40
1649	1969	October	Fixed-wing	-19.1037	34.5478	1	1	Blue wildebeest	20
1650	1969	October	Fixed-wing	-19.1144	34.5469	1	1	Blue wildebeest	40
1651	1969	October	Fixed-wing	-19.1292	34.5311	1	1	Blue wildebeest	80
1652	1969	October	Fixed-wing	-19.1269	34.5399	1	1	Blue wildebeest	8
1653	1969	October	Fixed-wing	-19.1237	34.5483	1	1	Blue wildebeest	70
1654	1969	October	Fixed-wing	-19.1251	34.5237	1	1	Blue wildebeest	80
1655	1969	October	Fixed-wing	-19.1427	34.5376	1	1	Blue wildebeest	50
1656	1969	October	Fixed-wing	-19.1357	34.5459	1	1	Blue wildebeest	59
1657	1972	October	Fixed-wing	-18.4713	34.4123	1	0	Blue wildebeest	20
1658	1972	October	Fixed-wing	-18.4525	34.4819	1	0	Blue wildebeest	40
1659	1972	October	Fixed-wing	-18.4713	34.5218	1	0	Blue wildebeest	117
1660	1972	October	Fixed-wing	-18.4793	34.5509	1	0	Blue wildebeest	2
1661	1972	October	Fixed-wing	-18.5091	34.6089	1	0	Blue wildebeest	320
1662	1972	October	Fixed-wing	-18.5272	34.4943	1	0	Blue wildebeest	460
1663	1972	October	Fixed-wing	-18.5192	34.5277	1	0	Blue wildebeest	30
1664	1972	October	Fixed-wing	-18.554	34.5008	1	0	Blue wildebeest	375
1665	1972	October	Fixed-wing	-18.5403	34.5516	1	0	Blue wildebeest	900
1666	1972	October	Fixed-wing	-18.5867	34.4711	1	0	Blue wildebeest	130
1667	1972	October	Fixed-wing	-18.615	34.5813	1	0	Blue wildebeest	204
1668	1972	October	Fixed-wing	-18.5743	34.6314	1	0	Blue wildebeest	320
1669	1972	October	Fixed-wing	-18.657	34.6205	1	0	Blue wildebeest	135
1670	1972	October	Fixed-wing	-18.6773	34.6118	1	0	Blue wildebeest	45
1671	1972	October	Fixed-wing	-18.7666	34.2709	1	0	Blue wildebeest	5
1672	1972	October	Fixed-wing	-18.7462	34.2498	1	0	Blue wildebeest	76
1673	1972	October	Fixed-wing	-18.7114	34.2665	1	0	Blue wildebeest	105
1674	1972	October	Fixed-wing	-18.7005	34.6125	1	1	Blue wildebeest	109
1675	1972	October	Fixed-wing	-18.7332	34.5944	1	1	Blue wildebeest	98
1676	1972	October	Fixed-wing	-18.7375	34.6147	1	1	Blue wildebeest	100
1677	1972	October	Fixed-wing	-18.6744	34.3463	1	1	Blue wildebeest	10
1678	1972	October	Fixed-wing	-18.9073	34.2491	1	1	Blue wildebeest	20
1679	1972	October	Fixed-wing	-18.7223	34.392	1	1	Blue wildebeest	20
1680	1972	October	Fixed-wing	-18.7811	34.3906	1	1	Blue wildebeest	21
1681	1972	October	Fixed-wing	-18.7956	34.4377	1	1	Blue wildebeest	35
1682	1972	October	Fixed-wing	-18.8195	34.4609	1	1	Blue wildebeest	30
1683	1972	October	Fixed-wing	-18.8166	34.4754	1	1	Blue wildebeest	8
1684	1972	October	Fixed-wing	-18.8152	34.495	1	1	Blue wildebeest	15
1685	1972	October	Fixed-wing	-18.7978	34.495	1	1	Blue wildebeest	42
1686	1972	October	Fixed-wing	-18.8442	34.3391	1	1	Blue wildebeest	22
1687	1972	October	Fixed-wing	-18.863	34.3855	1	1	Blue wildebeest	3
1688	1972	October	Fixed-wing	-18.8558	34.4203	1	1	Blue wildebeest	97
1689	1972	October	Fixed-wing	-18.9138	34.3478	1	1	Blue wildebeest	20
1690	1972	October	Fixed-wing	-18.8703	34.429	1	1	Blue wildebeest	70
1691	1972	October	Fixed-wing	-18.9	34.4791	1	1	Blue wildebeest	65
1692	1972	October	Fixed-wing	-18.8442	34.5581	1	1	Blue wildebeest	49
1693	1972	October	Fixed-wing	-18.8841	34.5218	1	1	Blue wildebeest	37
1694	1972	October	Fixed-wing	-18.8986	34.5313	1	1	Blue wildebeest	25
1695	1972	October	Fixed-wing	-19.011	34.2788	1	1	Blue wildebeest	10
1696	1972	October	Fixed-wing	-18.9914	34.3216	1	1	Blue wildebeest	16
1697	1972	October	Fixed-wing	-18.9791	34.3332	1	1	Blue wildebeest	50
1698	1972	October	Fixed-wing	-18.9145	34.5588	1	1	Blue wildebeest	25
1699	1972	October	Fixed-wing	-19.0219	34.5639	1	1	Blue wildebeest	20
1700	1972	October	Fixed-wing	-19.0814	34.5574	1	1	Blue wildebeest	60
1701	1972	October	Fixed-wing	-19.0299	34.3985	1	1	Blue wildebeest	10
1702	1972	October	Fixed-wing	-19.0212	34.4406	1	1	Blue wildebeest	57
1703	1972	October	Fixed-wing	-19.0487	34.4682	1	1	Blue wildebeest	30
1704	1972	October	Fixed-wing	-19.0763	34.4805	1	1	Blue wildebeest	110
1705	1972	October	Fixed-wing	-19.0843	34.5226	1	1	Blue wildebeest	65
1706	1972	October	Fixed-wing	-19.1024	34.5081	1	1	Blue wildebeest	300
1707	1972	October	Fixed-wing	-19.1162	34.516	1	1	Blue wildebeest	500
1708	1972	October	Fixed-wing	-19.1198	34.532	1	1	Blue wildebeest	400
1709	1972	October	Fixed-wing	-19.1307	34.5668	1	1	Blue wildebeest	64
1710	1972	October	Fixed-wing	-19.1553	34.5472	1	1	Blue wildebeest	220
1711	1972	October	Fixed-wing	-19.1401	34.5393	1	1	Blue wildebeest	260
1712	1972	October	Fixed-wing	-18.3691	34.7648	1	0	Blue wildebeest	50
1713	1969	October	Fixed-wing	-18.2992	34.5608	1	0	Zebra	5
1714	1969	October	Fixed-wing	-18.2992	34.5733	1	0	Zebra	15
1715	1969	October	Fixed-wing	-18.2786	34.6179	1	0	Zebra	6
1716	1969	October	Fixed-wing	-18.2872	34.627	1	0	Zebra	8
1717	1969	October	Fixed-wing	-18.3329	34.5516	1	0	Zebra	12
1718	1969	October	Fixed-wing	-18.3449	34.5551	1	0	Zebra	6
1719	1969	October	Fixed-wing	-18.3369	34.6613	1	0	Zebra	10
1720	1969	October	Fixed-wing	-18.3517	34.7076	1	0	Zebra	30
1721	1969	October	Fixed-wing	-18.3769	34.6779	1	0	Zebra	5
1722	1969	October	Fixed-wing	-18.3717	34.7418	1	0	Zebra	16
1723	1969	October	Fixed-wing	-18.3797	34.739	1	0	Zebra	25
1724	1969	October	Fixed-wing	-18.3889	34.7007	1	0	Zebra	30
1725	1969	October	Fixed-wing	-18.402	34.7099	1	0	Zebra	40
1726	1969	October	Fixed-wing	-18.4203	34.4659	1	0	Zebra	4
1727	1969	October	Fixed-wing	-18.4203	34.4768	1	0	Zebra	75
1728	1969	October	Fixed-wing	-18.4397	34.4785	1	0	Zebra	25
1729	1969	October	Fixed-wing	-18.4563	34.4614	1	0	Zebra	4
1730	1969	October	Fixed-wing	-18.4494	34.5008	1	0	Zebra	10
1731	1969	October	Fixed-wing	-18.4448	34.5133	1	0	Zebra	11
1732	1969	October	Fixed-wing	-18.4368	34.5202	1	0	Zebra	5
1733	1969	October	Fixed-wing	-18.4489	34.5419	1	0	Zebra	7
1734	1969	October	Fixed-wing	-18.4557	34.5482	1	0	Zebra	28
1735	1969	October	Fixed-wing	-18.4557	34.5979	1	0	Zebra	20
1736	1969	October	Fixed-wing	-18.47	34.6053	1	0	Zebra	26
1737	1969	October	Fixed-wing	-18.4134	34.6413	1	0	Zebra	7
1738	1969	October	Fixed-wing	-18.4237	34.6784	1	0	Zebra	7
1739	1969	October	Fixed-wing	-18.418	34.6916	1	0	Zebra	5
1740	1969	October	Fixed-wing	-18.43	34.7093	1	0	Zebra	26
1741	1969	October	Fixed-wing	-18.4191	34.7139	1	0	Zebra	14
1742	1969	October	Fixed-wing	-18.4174	34.7236	1	0	Zebra	120
1743	1969	October	Fixed-wing	-18.4477	34.663	1	0	Zebra	20
1744	1969	October	Fixed-wing	-18.4723	34.6499	1	0	Zebra	8
1745	1969	October	Fixed-wing	-18.4843	34.6493	1	0	Zebra	10
1746	1969	October	Fixed-wing	-18.5558	34.507	1	0	Zebra	13
1747	1969	October	Fixed-wing	-18.5394	34.5664	1	0	Zebra	8
1748	1969	October	Fixed-wing	-18.5312	34.5782	1	0	Zebra	12
1749	1969	October	Fixed-wing	-18.5271	34.6134	1	0	Zebra	17
1750	1969	October	Fixed-wing	-18.5389	34.6175	1	0	Zebra	10
1751	1969	October	Fixed-wing	-18.5197	34.6372	1	0	Zebra	40
1752	1969	October	Fixed-wing	-18.5526	34.6386	1	0	Zebra	4
1753	1969	October	Fixed-wing	-18.5563	34.6536	1	0	Zebra	5
1754	1969	October	Fixed-wing	-18.5435	34.6801	1	0	Zebra	13
1755	1969	October	Fixed-wing	-18.5755	34.4064	1	0	Zebra	5
1756	1969	October	Fixed-wing	-18.586	34.4407	1	0	Zebra	8
1757	1969	October	Fixed-wing	-18.5979	34.4603	1	0	Zebra	8
1758	1969	October	Fixed-wing	-18.5828	34.5097	1	0	Zebra	14
1759	1969	October	Fixed-wing	-18.5769	34.5243	1	0	Zebra	7
1760	1969	October	Fixed-wing	-18.5782	34.5467	1	0	Zebra	6
1761	1969	October	Fixed-wing	-18.5856	34.5216	1	0	Zebra	4
1762	1969	October	Fixed-wing	-18.5842	34.5312	1	0	Zebra	7
1763	1969	October	Fixed-wing	-18.5933	34.5261	1	0	Zebra	10
1764	1969	October	Fixed-wing	-18.602	34.5216	1	0	Zebra	9
1765	1969	October	Fixed-wing	-18.6102	34.528	1	0	Zebra	15
1766	1969	October	Fixed-wing	-18.6203	34.5257	1	0	Zebra	15
1767	1969	October	Fixed-wing	-18.6189	34.5083	1	0	Zebra	8
1768	1969	October	Fixed-wing	-18.5933	34.5737	1	0	Zebra	4
1769	1969	October	Fixed-wing	-18.6029	34.5741	1	0	Zebra	13
1770	1969	October	Fixed-wing	-18.602	34.5874	1	0	Zebra	8
1771	1969	October	Fixed-wing	-18.6212	34.591	1	0	Zebra	22
1772	1969	October	Fixed-wing	-18.6125	34.607	1	0	Zebra	5
1773	1969	October	Fixed-wing	-18.6349	34.6262	1	0	Zebra	60
1774	1969	October	Fixed-wing	-18.6381	34.5344	1	0	Zebra	15
1775	1969	October	Fixed-wing	-18.6523	34.5636	1	0	Zebra	31
1776	1969	October	Fixed-wing	-18.6345	34.5997	1	0	Zebra	13
1777	1969	October	Fixed-wing	-18.6472	34.5988	1	0	Zebra	7
1778	1969	October	Fixed-wing	-18.6436	34.6093	1	0	Zebra	3
1779	1969	October	Fixed-wing	-18.6518	34.6171	1	0	Zebra	6
1780	1969	October	Fixed-wing	-18.6619	34.6157	1	0	Zebra	4
1781	1969	October	Fixed-wing	-18.671	34.6111	1	0	Zebra	45
1782	1969	October	Fixed-wing	-18.6696	34.5979	1	0	Zebra	54
1783	1969	October	Fixed-wing	-18.6683	34.634	1	0	Zebra	6
1784	1969	October	Fixed-wing	-18.6751	34.6267	1	0	Zebra	11
1785	1969	October	Fixed-wing	-18.6907	34.6153	1	0	Zebra	16
1786	1969	October	Fixed-wing	-18.6253	34.3607	1	0	Zebra	14
1787	1969	October	Fixed-wing	-18.6491	34.326	1	0	Zebra	6
1788	1969	October	Fixed-wing	-18.661	34.315	1	0	Zebra	19
1789	1969	October	Fixed-wing	-18.6678	34.3342	1	0	Zebra	40
1790	1969	October	Fixed-wing	-18.6834	34.3237	1	0	Zebra	45
1791	1969	October	Fixed-wing	-18.778	34.2711	1	0	Zebra	9
1792	1969	October	Fixed-wing	-19.0179	34.2145	1	0	Zebra	6
1793	1969	October	Fixed-wing	-18.6171	34.3758	1	1	Zebra	10
1794	1969	October	Fixed-wing	-18.6185	34.3991	1	1	Zebra	3
1795	1969	October	Fixed-wing	-18.6267	34.4128	1	1	Zebra	7
1796	1969	October	Fixed-wing	-18.6326	34.4229	1	1	Zebra	6
1797	1969	October	Fixed-wing	-18.6555	34.5284	1	1	Zebra	17
1798	1969	October	Fixed-wing	-18.6637	34.5449	1	1	Zebra	11
1799	1969	October	Fixed-wing	-18.6907	34.597	1	1	Zebra	20
1800	1969	October	Fixed-wing	-18.7007	34.6111	1	1	Zebra	13
1801	1969	October	Fixed-wing	-18.7149	34.3219	1	1	Zebra	15
1802	1969	October	Fixed-wing	-18.7062	34.3328	1	1	Zebra	24
1803	1969	October	Fixed-wing	-18.6893	34.3424	1	1	Zebra	54
1804	1969	October	Fixed-wing	-18.7149	34.3493	1	1	Zebra	7
1805	1969	October	Fixed-wing	-18.687	34.3991	1	1	Zebra	12
1806	1969	October	Fixed-wing	-18.7199	34.4357	1	1	Zebra	15
1807	1969	October	Fixed-wing	-18.7706	34.4864	1	1	Zebra	10
1808	1969	October	Fixed-wing	-18.7706	34.4955	1	1	Zebra	8
1809	1969	October	Fixed-wing	-18.7679	34.5686	1	1	Zebra	8
1810	1969	October	Fixed-wing	-18.7647	34.6025	1	1	Zebra	31
1811	1969	October	Fixed-wing	-18.7775	34.3077	1	1	Zebra	9
1812	1969	October	Fixed-wing	-18.7885	34.3104	1	1	Zebra	6
1813	1969	October	Fixed-wing	-18.7853	34.3182	1	1	Zebra	6
1814	1969	October	Fixed-wing	-18.8058	34.3095	1	1	Zebra	10
1815	1969	October	Fixed-wing	-18.7953	34.3196	1	1	Zebra	8
1816	1969	October	Fixed-wing	-18.8013	34.3324	1	1	Zebra	8
1817	1969	October	Fixed-wing	-18.8342	34.5312	1	1	Zebra	18
1818	1969	October	Fixed-wing	-18.8319	34.5526	1	1	Zebra	8
1819	1969	October	Fixed-wing	-18.8575	34.5101	1	1	Zebra	40
1820	1969	October	Fixed-wing	-18.863	34.2949	1	1	Zebra	6
1821	1969	October	Fixed-wing	-18.878	34.3566	1	1	Zebra	12
1822	1969	October	Fixed-wing	-18.8502	34.3849	1	1	Zebra	43
1823	1969	October	Fixed-wing	-18.8995	34.4114	1	1	Zebra	3
1824	1969	October	Fixed-wing	-18.9009	34.4215	1	1	Zebra	7
1825	1969	October	Fixed-wing	-18.8963	34.5271	1	1	Zebra	60
1826	1969	October	Fixed-wing	-18.9173	34.5595	1	1	Zebra	5
1827	1969	October	Fixed-wing	-18.9091	34.4868	1	1	Zebra	6
1828	1969	October	Fixed-wing	-18.9667	34.395	1	1	Zebra	4
1829	1969	October	Fixed-wing	-18.9726	34.3031	1	1	Zebra	5
1830	1969	October	Fixed-wing	-18.9699	34.3141	1	1	Zebra	1
1831	1969	October	Fixed-wing	-18.9841	34.3168	1	1	Zebra	7
1832	1969	October	Fixed-wing	-19.0522	34.2304	1	1	Zebra	7
1833	1969	October	Fixed-wing	-19.0554	34.24	1	1	Zebra	4
1834	1969	October	Fixed-wing	-19.0618	34.2529	1	1	Zebra	10
1835	1969	October	Fixed-wing	-19.0389	34.2652	1	1	Zebra	5
1836	1969	October	Fixed-wing	-19.0101	34.3881	1	1	Zebra	12
1837	1969	October	Fixed-wing	-19.0238	34.4059	1	1	Zebra	5
1838	1969	October	Fixed-wing	-18.9694	34.5435	1	1	Zebra	12
1839	1969	October	Fixed-wing	-18.9864	34.5467	1	1	Zebra	5
1840	1969	October	Fixed-wing	-19.0138	34.538	1	1	Zebra	14
1841	1969	October	Fixed-wing	-19.0288	34.4786	1	1	Zebra	15
1842	1969	October	Fixed-wing	-19.0353	34.4695	1	1	Zebra	20
1843	1969	October	Fixed-wing	-19.0572	34.4791	1	1	Zebra	10
1844	1969	October	Fixed-wing	-19.0252	34.5362	1	1	Zebra	5
1845	1969	October	Fixed-wing	-19.0225	34.5467	1	1	Zebra	10
1846	1969	October	Fixed-wing	-19.0316	34.5586	1	1	Zebra	6
1847	1969	October	Fixed-wing	-19.0403	34.5088	1	1	Zebra	3
1848	1969	October	Fixed-wing	-19.0522	34.5248	1	1	Zebra	5
1849	1969	October	Fixed-wing	-19.0439	34.5472	1	1	Zebra	7
1850	1969	October	Fixed-wing	-19.096	34.5083	1	1	Zebra	16
1851	1969	October	Fixed-wing	-19.0924	34.5197	1	1	Zebra	16
1852	1969	October	Fixed-wing	-19.0878	34.5312	1	1	Zebra	10
1853	1969	October	Fixed-wing	-19.1152	34.5615	1	1	Zebra	10
1854	1969	October	Fixed-wing	-19.151	34.5341	1	1	Zebra	12
1855	1969	October	Fixed-wing	-19.1441	34.5421	1	1	Zebra	7
1856	1969	October	Fixed-wing	-19.1411	34.5363	1	1	Zebra	19
1857	1969	October	Fixed-wing	-19.1305	34.5297	1	1	Zebra	25
1858	1969	October	Fixed-wing	-19.1346	34.5396	1	1	Zebra	8
1859	1969	October	Fixed-wing	-19.1357	34.5498	1	1	Zebra	6
1860	1969	October	Fixed-wing	-19.1213	34.5168	1	1	Zebra	44
1861	1969	October	Fixed-wing	-19.1227	34.5289	1	1	Zebra	10
1862	1969	October	Fixed-wing	-19.1245	34.5373	1	1	Zebra	20
1863	1969	October	Fixed-wing	-19.1249	34.5487	1	1	Zebra	11
1864	1969	October	Fixed-wing	-19.1147	34.507	1	1	Zebra	12
1865	1969	October	Fixed-wing	-19.1158	34.5205	1	1	Zebra	19
1866	1969	October	Fixed-wing	-19.1165	34.5329	1	1	Zebra	10
1867	1969	October	Fixed-wing	-19.1165	34.5403	1	1	Zebra	12
1868	1969	October	Fixed-wing	-19.1165	34.549	1	1	Zebra	8
1869	1969	October	Fixed-wing	-19.1074	34.5128	1	1	Zebra	11
1870	1969	October	Fixed-wing	-19.107	34.5234	1	1	Zebra	8
1871	1969	October	Fixed-wing	-19.1081	34.5326	1	1	Zebra	8
1872	1969	October	Fixed-wing	-19.1085	34.5403	1	1	Zebra	14
1873	1969	October	Fixed-wing	-19.1085	34.5479	1	1	Zebra	10
1874	1969	October	Fixed-wing	-19.0982	34.5348	1	1	Zebra	6
1875	1969	October	Fixed-wing	-19.0927	34.5417	1	1	Zebra	12
1876	1969	October	Fixed-wing	-19.1008	34.5476	1	1	Zebra	9
1877	1972	October	Fixed-wing	-18.2727	34.689	1	0	Zebra	30
1878	1972	October	Fixed-wing	-18.2763	34.721	1	0	Zebra	10
1879	1972	October	Fixed-wing	-18.3815	34.7558	1	0	Zebra	80
1880	1972	October	Fixed-wing	-18.4163	34.7202	1	0	Zebra	5
1881	1972	October	Fixed-wing	-18.4062	34.4598	1	0	Zebra	5
1882	1972	October	Fixed-wing	-18.4627	34.4054	1	0	Zebra	15
1883	1972	October	Fixed-wing	-18.5222	34.4714	1	0	Zebra	100
1884	1972	October	Fixed-wing	-18.4838	34.507	1	0	Zebra	27
1885	1972	October	Fixed-wing	-18.4743	34.5403	1	0	Zebra	5
1886	1972	October	Fixed-wing	-18.4968	34.5519	1	0	Zebra	30
1887	1972	October	Fixed-wing	-18.5556	34.5179	1	0	Zebra	76
1888	1972	October	Fixed-wing	-18.5324	34.5614	1	0	Zebra	100
1889	1972	October	Fixed-wing	-18.5273	34.6201	1	0	Zebra	521
1890	1972	October	Fixed-wing	-18.5694	34.6035	1	0	Zebra	55
1891	1972	October	Fixed-wing	-18.618	34.5469	1	0	Zebra	65
1892	1972	October	Fixed-wing	-18.6564	34.6107	1	0	Zebra	87
1893	1972	October	Fixed-wing	-18.6832	34.6274	1	0	Zebra	41
1894	1972	October	Fixed-wing	-18.581	34.3779	1	0	Zebra	10
1895	1972	October	Fixed-wing	-18.5926	34.3518	1	0	Zebra	8
1896	1972	October	Fixed-wing	-18.6151	34.3648	1	0	Zebra	5
1897	1972	October	Fixed-wing	-18.713	34.2792	1	0	Zebra	20
1898	1972	October	Fixed-wing	-18.7267	34.2821	1	0	Zebra	13
1899	1972	October	Fixed-wing	-18.7565	34.2292	1	0	Zebra	5
1900	1972	October	Fixed-wing	-18.6847	34.343	1	1	Zebra	33
1901	1972	October	Fixed-wing	-18.7224	34.3503	1	1	Zebra	36
1902	1972	October	Fixed-wing	-18.7616	34.3191	1	1	Zebra	1
1903	1972	October	Fixed-wing	-18.7492	34.5947	1	1	Zebra	57
1904	1972	October	Fixed-wing	-18.7536	34.6165	1	1	Zebra	121
1905	1972	October	Fixed-wing	-18.7949	34.3728	1	1	Zebra	3
1906	1972	October	Fixed-wing	-18.7485	34.4627	1	1	Zebra	251
1907	1972	October	Fixed-wing	-18.7688	34.5033	1	1	Zebra	201
1908	1972	October	Fixed-wing	-18.8102	34.4605	1	1	Zebra	13
1909	1972	October	Fixed-wing	-18.8283	34.5106	1	1	Zebra	23
1910	1972	October	Fixed-wing	-18.808	34.5505	1	1	Zebra	125
1911	1972	October	Fixed-wing	-18.8602	34.3416	1	1	Zebra	8
1912	1972	October	Fixed-wing	-18.8784	34.3503	1	1	Zebra	16
1913	1972	October	Fixed-wing	-18.8994	34.3866	1	1	Zebra	8
1914	1972	October	Fixed-wing	-18.8414	34.4671	1	1	Zebra	10
1915	1972	October	Fixed-wing	-18.8493	34.4547	1	1	Zebra	5
1916	1972	October	Fixed-wing	-18.8617	34.449	1	1	Zebra	20
1917	1972	October	Fixed-wing	-18.8914	34.4562	1	1	Zebra	17
1918	1972	October	Fixed-wing	-18.8544	34.5491	1	1	Zebra	20
1919	1972	October	Fixed-wing	-18.9081	34.4975	1	1	Zebra	6
1920	1972	October	Fixed-wing	-18.9132	34.5179	1	1	Zebra	20
1921	1972	October	Fixed-wing	-18.9023	34.5432	1	1	Zebra	68
1922	1972	October	Fixed-wing	-18.9241	34.343	1	1	Zebra	10
1923	1972	October	Fixed-wing	-18.9429	34.3111	1	1	Zebra	67
1924	1972	October	Fixed-wing	-18.9596	34.3278	1	1	Zebra	40
1925	1972	October	Fixed-wing	-19.0263	34.2234	1	1	Zebra	5
1926	1972	October	Fixed-wing	-19.0212	34.2691	1	1	Zebra	15
1927	1972	October	Fixed-wing	-18.9959	34.2683	1	1	Zebra	31
1928	1972	October	Fixed-wing	-18.9944	34.3111	1	1	Zebra	5
1929	1972	October	Fixed-wing	-18.9835	34.322	1	1	Zebra	64
1930	1972	October	Fixed-wing	-19.0184	34.4004	1	1	Zebra	5
1931	1972	October	Fixed-wing	-19.0445	34.404	1	1	Zebra	14
1932	1972	October	Fixed-wing	-19.0155	34.5091	1	1	Zebra	10
1933	1972	October	Fixed-wing	-19.0648	34.4649	1	1	Zebra	135
1934	1972	October	Fixed-wing	-19.0967	34.5084	1	1	Zebra	47
1935	1972	October	Fixed-wing	-19.08	34.5295	1	1	Zebra	121
1936	1972	October	Fixed-wing	-19.0967	34.5549	1	1	Zebra	60
1937	1972	October	Fixed-wing	-19.1177	34.5237	1	1	Zebra	146
1938	1972	October	Fixed-wing	-19.1112	34.5418	1	1	Zebra	76
1939	1972	October	Fixed-wing	-19.1337	34.5367	1	1	Zebra	40
1940	1972	October	Fixed-wing	-19.1308	34.5592	1	1	Zebra	30
1941	1972	October	Fixed-wing	-19.1511	34.5519	1	1	Zebra	30
1942	1972	October	Fixed-wing	-19.0996	34.4736	1	0	Zebra	3
1943	1994	June	Fixed-wing	-18.5924	34.4375	1	0	Common reedbuck	1
1944	1994	June	Fixed-wing	-18.7248	34.6669	1	0	Nyala	1
1945	1994	June	Fixed-wing	-18.6876	34.4203	1	1	Common reedbuck	2
1946	1994	June	Fixed-wing	-18.7783	34.579	1	1	Zebra	3
1947	1994	June	Fixed-wing	-18.7828	34.5853	1	1	Common reedbuck	1
1948	1994	June	Fixed-wing	-18.8018	34.5255	1	1	Common reedbuck	2
1949	1994	June	Fixed-wing	-18.7973	34.5155	1	1	Waterbuck	6
1950	1994	June	Fixed-wing	-18.7565	34.4466	1	1	Elephant	5
1951	1994	June	Fixed-wing	-18.8091	34.4448	1	1	Oribi	1
1952	1994	June	Fixed-wing	-18.8698	34.5491	1	1	Common reedbuck	1
1953	1994	June	Fixed-wing	-18.8544	34.4285	1	1	Common reedbuck	2
1954	1994	June	Fixed-wing	-18.8481	34.4176	1	1	Common reedbuck	2
1955	1994	June	Fixed-wing	-18.7755	34.2961	1	1	Common reedbuck	1
1956	1994	June	Fixed-wing	-18.761	34.2689	1	0	Common reedbuck	2
1957	1994	June	Fixed-wing	-18.9306	34.2816	1	1	Common reedbuck	1
1958	1994	June	Fixed-wing	-18.9977	34.2172	1	0	Common reedbuck	1
1959	1997	October	Fixed-wing	-18.95	34.3833	1	1	Oribi	2
1960	1997	October	Fixed-wing	-18.9667	34.4333	1	1	Oribi	3
1961	1997	October	Fixed-wing	-18.9167	34.4833	1	1	Waterbuck	4
1962	1997	October	Fixed-wing	-18.9167	34.4833	1	1	Kudu	3
1963	1997	October	Fixed-wing	-18.9167	34.4833	1	1	Oribi	1
1964	1997	October	Fixed-wing	-18.9167	34.4833	1	1	Kudu	1
1965	1997	October	Fixed-wing	-18.9	34.3167	1	1	Warthog	1
1966	1997	October	Fixed-wing	-18.9	34.4167	1	1	Bushbuck	1
1967	1997	October	Fixed-wing	-18.8667	34.6167	1	0	Zebra	2
1968	1997	October	Fixed-wing	-18.8667	34.3833	1	1	Kudu	2
1969	1997	October	Fixed-wing	-18.8667	34.3667	1	1	Oribi	1
1970	1997	October	Fixed-wing	-18.8167	34.3333	1	1	Oribi	1
1971	1997	October	Fixed-wing	-18.8167	34.3333	1	1	Waterbuck	15
1972	1997	October	Fixed-wing	-18.8167	34.5167	1	1	Waterbuck	25
1973	1997	October	Fixed-wing	-18.8	34.5167	1	1	Bushbuck	1
1974	1997	October	Fixed-wing	-18.8	34.3333	1	1	Warthog	4
1975	1997	October	Fixed-wing	-19	34.6	1	0	Kudu	1
1976	1997	October	Fixed-wing	-19.0167	34.7167	1	0	Kudu	1
1977	1997	October	Fixed-wing	-19.0333	34.6333	1	0	Warthog	1
1978	1997	October	Fixed-wing	-19.0333	34.6	1	1	Oribi	1
1979	1997	October	Fixed-wing	-19.0333	34.5833	1	1	Waterbuck	2
1980	1997	October	Fixed-wing	-19.0333	34.5167	1	1	Bushbuck	1
1981	1997	October	Fixed-wing	-19.0333	34.4167	1	1	Oribi	3
1982	1997	October	Fixed-wing	-19.0333	34.4833	1	1	Warthog	8
1983	1997	October	Fixed-wing	-19.0333	34.4333	1	1	Warthog	6
1984	1997	October	Fixed-wing	-19.0333	34.4167	1	1	Oribi	3
1985	1997	October	Fixed-wing	-19.05	34.5	1	1	Kudu	1
1986	1997	October	Fixed-wing	-19.0667	34.5667	1	1	Hippo	6
1987	1997	October	Fixed-wing	-19.0833	34.5167	1	1	Oribi	3
1988	1997	October	Fixed-wing	-19.1167	34.5667	1	1	Warthog	1
1989	1997	October	Fixed-wing	-19.1833	34.5833	1	0	Bushbuck	1
1990	1997	October	Fixed-wing	-18.9	34.35	1	1	Kudu	4
1991	1997	October	Fixed-wing	-18.8833	34.35	1	1	Kudu	1
1992	1997	October	Fixed-wing	-18.8833	34.3333	1	1	Kudu	1
1993	1997	October	Fixed-wing	-18.8667	34.3167	1	1	Warthog	6
1994	1997	October	Fixed-wing	-18.7667	34.4167	1	1	Oribi	2
1995	1997	October	Fixed-wing	-18.7667	34.4667	1	1	Waterbuck	2
1996	1997	October	Fixed-wing	-18.7667	34.4667	1	1	Bushbuck	1
1997	1997	October	Fixed-wing	-18.7667	34.5167	1	1	Oribi	4
1998	1997	October	Fixed-wing	-18.7667	34.5333	1	1	Waterbuck	9
1999	1997	October	Fixed-wing	-18.7667	34.6667	1	0	Bushbuck	1
[truncated: 68,103 more rows]
